# Supplementary material for: The peopling of South America and the trans-Andean gene flow of the first settlers
Source: HighWire-hosted journal article supplement (doi:10.1101/gr.234674.118), 2018-05-07
Supplement: Supplemental_Legends.docx [file Supplemental_Legends.docx]

**Supplemental Material**

**Supplemental Text.**

**Supplemental Figure S1.** MDS of Native American samples from South America vs. other reference populations from Africa and Europe taken from 1000G.

**Supplemental Figure S2**. MDS of Native American samples from South America.

**Supplemental Figure S3**. Map of interpolated IBS values between Peruvians and other Native American samples from South America. Dots indicate sample geographical sources.

**Supplemental Figure S4.** EBSP for haplogroup B2b3 obtained from HVS-I data. Generation time (g) is expressed in years because calibration uses a fixed mutation rate (that is expressed in mutations/site/years).

**Supplemental Table S1**. Diversity indices for B2 sub-haplogroups in different geographic areas.

**Supplemental Table S2**. CR data (from the literature) of samples belonging to the B2 sub-haplogroups evaluated in the study. In addition, control region data from mitogenomes are also included.

**Supplemental Table S3**. Andeanmigration models and their probabilities. Θ = mutation scale population sizes; M = mutation scale immigration rates (sub-indexes are: P = Peru; B = Bolivia; A_NW = North-western Argentina; in brackets is the number of immigrants per generation or *Nm*).

**Supplemental Table S4**. Migration models from/to northern Argentina and their probabilities. Θ = mutation scale population sizes; M = mutation scale immigration rates (sub-indexes are B = Bolivia; A_NW = North-western Argentina; A_NE = North-eastern Argentina; in brackets is the number of immigrants per generation or *Nm*).

**Supplemental Table S5**. List of complete genomes used to build the phylogenetic trees of **Figures 1** to **4**. Information on the geographic origin and ethnic affiliation of samples is included. References of the revised literature are included.

**Supplemental Table S6.** HVS-I sequence (from np 16024 to np 16569) and SNP data from Kolla (N = 45) and Diaguita (N = 24) of northern Argentina.

**Supplemental Table S7**. List of the 570 mitogenomes used, together with the 72 B2 mitogenomes newly obtained in this study, for the ML analysis.

**Supplemental Table S8**. ML TMRCA estimates for B2 clades and sub-clades.

**Supplemental Table S9**. Reference populations used for the analyses of autosomal SNPs.

**Supplemental Table S10**. List of articles containing mtDNA sequence data used in the present paper (e.g. interpolated frequency maps of Figures 1 to 4).

**Supplemental Table S11**. List of B2b mitogenomes assessed in this study (other than the B2b3, B2b11 and B2b14 mitogenomes shown in panel A of **Figure 4**).
