# Supplementary material for: The peopling of South America and the trans-Andean gene flow of the first settlers
Source: HighWire-hosted journal article supplement (doi:10.1101/gr.234674.118), 2018-05-07
Supplement: Supplemental_Material.docx [file Supplemental_Material.docx]

**Supplemental Data**

**Supplemental Text**

**PCR amplification, sequencing and SNP analysis.** The mtDNA control-region of the Diaguita and Kolla mtDNAs was amplified using previously reported primers (Álvarez-Iglesias et al. 2009). It was not possible to sequence the complete mitogenome from these samples due to the low quality and quantity of DNA obtained after extraction. Briefly, PCR was carried out in a 10µL final reaction volume consisting of 3 µL QIAGEN master mix, 1 µL for each primer (5 µM), and 2 µL of DNA (5 ng). Amplification was carried out in a GeneAmp PCR System 9700 (Applied Biosystems, Foster City, California, USA) using a hot start at 95ºC for 15 min and followed by 30 cycles at 94ºC for 30 s, 58ºC for 90 s, and 72ºC for 90 s and a final extension at 72ºC for 10 min. Prior to the sequencing reaction, PCR products were checked by electrophoresis in polyacrylamide non-denaturing gel, and subsequently stained with silver nitrate. PCR products were then purified with a Multiscreen PCRµ96 Plate 96-well device (Millipore, Bedford, MA 01730, USA). The sequencing reaction was performed on both strands, when needed, in a GeneAmp PCR System 9700 (Applied Biosystems) using the BigDye® Terminator v3.1 Cycle Sequencing Kit (Applied Biosystems). It was carried out using 0.5 µL of BigDye Terminator Kit, 2 µL of BigDye terminator Buffer, 1 µL PCR Forward or Reverse primer, 3.3 µL of PCR purified product in a final volume of 10 µL. Sequencing program consisted in a hot start at 96ºC for 3 min, followed by 25 cycles at 96ºC for 30 s, 50ºC for 10 s, and 60ºC for 4 min.

PCR multiplex and posterior minisequencing SNaPshot® reactions for the analysis of mtDNA coding region SNPs in the Argentinian samples were carried out using the same conditions and primers as in Alvarez-Iglesias et al. (2007).

Complete mitogenome sequences of selected individuals were obtained following previously described protocols (2011). Primers for amplification and sequencing were those reported by Torroni et al. (2001). PCR was performed using 10 µL of the reaction mixture, containing 4 µL of PCR Master Mix (Qiagen; Hilden, Germany), 0.5 µL 1 µM of each primer, 1 µL of sample template and 4 µL of water. This PCR was carried out in a 9700 Thermocycler (Applied Biosystems) using the following conditions: one cycle at 95°C for 15 min and then 35 cycles at 94°C for 30 s, 58°C for 90 s and 72°C for 90 s with a full extension cycle at 72°C for 10 min. The sequencing procedures were undertaken using 11.5 µL of the following reaction mixture: 2.5 µL of sequencing buffer (5×), 0.5 µL of BigDye Terminator v3.1 Cycle Sequencing Kit (Applied Biosystems), 1 µL of the primer (to a final concentration of 1 µM), 3 µL of the purified PCR product and water up to 11.5 µL.

Sequencing products were purified using EdgeBio purification plates (Perfoma®V3 96-Well Shortplate), following the manufacturer protocol; capillary electrophoresis was performed in a ABI PRISM 3730 Genetic Analyzer (Applied Biosystems).

The resulting data were analyzed with SeqScape Software v2.1 (Applied Biosystems). Analysis of mitogenomes was carried out as described before (Cerezo et al. 2009; Gómez-Carballa et al. 2012).

We used the revised Cambridge Reference Sequence or rCRS (Andrews et al. 1999) as reference for mtDNA variations. Haplogroup nomenclature was based on previous studies and the reference phylogeny in PhyloTree; see mtDNA tree Build 17 (February 2016) (http://www.phylotree.org/) (van Oven and Kayser 2009), which is regularly updated. To reduce the impact of potential sequencing artifacts we followed previously described phylogenetic procedures (Bandelt et al. 2002; Salas et al. 2005; Kong et al. 2006).

**Diversity analysis**

Arlequin v3.5 (Excoffier and Lischer 2010) software was used for the computation of different molecular diversity indices by region, including haplotype (*HD*) and nucleotide (*π*) diversities, and the mean number of pairwise differences (*M*) (**Supplemental** **Table S1**). Diversity indices were computed using the sequence data from **Supplemental** **Table S2** and the sequence range from nucleotide position (np) 16090 to np 16362. The problematic variation around np 16189, which is usually associated with length heteroplasmy (e.g. 16182C or 16183C), was ignored.

**Coalescence times**

Coalescence times were estimated considering all substitutions except those at nps 16182, 16183 and 16519. In brief, we assumed the HKY85 mutation model (two parameters in the model of DNA evolution) with gamma-distributed rates (approximated by a discrete distribution with 32 categories). The estimated ages of macro-haplogroups M and N reported in Behar et al. (2012) were used as fixed priors, while the dates of ancient samples reported in Llamas et al. (2016) were used as tip calibration points (**Supplemental** **Table S5**). Mutational distances were converted into years using the corrected evolutionary rate for the entire molecule (1.6649 × 10-8 substitutions per nucleotide per year or one mutation every 3,624 years) from Soares et al. (2009) (**Supplemental** **Table S8**).

**Extended Bayesian Skyline Plots**

The demographic history of B2 sub-haplogroups was inferred using the Extended Bayesian Skyline Plot method (Heled and Drummond 2008) (EBSP) implemented in BEAST v1.8.2 (Drummond and Rambaut 2007). EBSPs allow the inferences of effective population size (*N*e) through time and also estimate the number of demographic changes from the data. For sub-haplogroups B2ai and B2aj we generated the EBSP using complete mitogenome data (**Supplemental Table S5**).

Aligned mitogenomes were divided into two partitions, representing the coding and non-coding regions (577-16023 and 16024-576, respectively). Partitions were analyzed using independent clocks and substitution models but a shared genealogy. For both partitions we estimated the best fitting substitution model from our data using jModelTest (Posada 2008). We used a mutation rate of 9.883 × 10−8 substitutions/nucleotide/year for the non-coding partition, while for the coding region we used a mutation rate of 1.708 × 10−8 substitutions/nucleotide/year, as previously reported in Soares et al. (2009). Both partitions were analyzed using a strict clock and separate substitution models with gamma-distributed rate variation across five categories and base frequencies estimated from the data. Two independent Markov chain-Monte Carlo runs of 200,000,000 steps each were performed, with samples taken every 1,000 steps and 10% discarded as burn-in.

In the case of sub-haplogroups B2b3 and B2y, we used control-region data (**Supplemental** **Table S2**) instead of mitogenomes to generate the demographic plot due to the limited number of available complete genomes and the possible sampling bias. It was not possible to obtain reliable demographic plots for sub-haplogroups B2b11 and B2b14 due to the limited data available that led to convergence problems after the analysis. The inference was carried out using the control-region range 16090-16365 and a mutation rate of 1.8899 × 10−7 substitutions/nucleotide/year (one mutation every 19,171 years) (Soares et al. 2009). We then used the control-region segment from these mitogenomes and ran them together with the other control-region data available for these clades (**Supplemental** **Table S2**). The best substitution model was also checked using jModeltest. The partition was run assuming a strict clock and gamma-distributed rate variation across five categories with base frequencies estimated from the data. Two independent Markov chain-Monte Carlo of 200,000,000 steps each were run, sampling every 1,000 steps and 10% discarded as burn-in.

Following Tracer (v1.6) output (<http://tree.bio.ed.ac.uk/software/tracer/)> (Drummond and Rambaut 2007) inspection for distributions convergence, both mitogenome and control-region runs were combined independently using LogCombiner v1.8.2 (Drummond and Rambaut 2007), with 10% discarded as burn-in. The csv file from the combined runs was generated through the VDAanalysis/CSVexport functions in BEAST and plotted using R Project for Statistical Computing v. 3.3.1 (https://www.r-project.org/)(R core development team 2011).

**Trans-Andean gene flow analysis**

We used the MIGRATE-n software v3.6.11 (Beerli and Felsenstein 1999) to study gene flow in different demographic scenarios. First, we examined gene flow in the Andean area using population sets from Peru, Bolivia and North-western Argentina (NW-Argentina). We compared different gene flow models following a linear Stepping Stone scheme, including the full migration model (Peru <-> Bolivia <-> NW-Argentina), unidirectional migration models (Peru -> Bolivia -> NW-Argentina; Peru <- Bolivia <- NW-Argentina), and the panmictic model among others (**Supplemental Table S3**). We then evaluated the scenario of a possible gene flow component from North-eastern Argentina (NE-Argentina) to NW-Argentina and Bolivian Andes. As in the case of the trans-Andean gene flow study, we compared four different models following a lineal Stepping Stone scheme: the full migration model (Bolivia <-> NW-Argentina <-> NE-Argentina), unidirectional migration models (Bolivia -> NW-Argentina -> NE-Argentina; Bolivia <- NW-Argentina <- NE-Argentina; Bolivia -> NW-Argentina <- NE-Argentina), and the panmictic model (**Supplemental Table S4**).

The mtDNA data (HVS-I: from np 16024 to np 16383) used for these analyses were retrieved from the literature and analyzed together with the new sequences from Native NW Argentineans obtained in the present study: 439 Native American mtDNAs from Peruvian Andes (Fuselli et al. 2003; Barbieri et al. 2011; Barbieri et al. 2014; Sandoval et al. 2016), 388 Native American mtDNAs from Bolivian Andes (Afonso-Costa et al. 2010; Taboada-Echalar et al. 2013), 299 Native American mtDNAs from NW-Argentinean populations (present study and (Álvarez-Iglesias et al. 2007; Cardoso et al. 2013)), and 69 Native American mtDNAs from NE-Argentina (samples from Formosa, Chaco, Corrientes, Misiones and Santa Fé; (Bobillo et al. 2010)). The ts/tv ratio and gamma shape parameter of the datasets were estimated with MEGA7 software (Kumar et al. 2016) through four gamma categories and the HKY substitution model (most similar to the F84 model used by MIGRATE-n). We employed a Bayesian approach that has been shown to be more efficient to obtain reliable results with less effort than the ML procedure when using a single locus (Beerli 2006).

We calculated the model probability and log Bayes factor (LBF) of each model through the log marginal values using the thermodynamic integration method (Beerli and Palczewski 2010); the best model should provide the highest log mL. The model ranking was established by comparing the LBF’s and probabilities with respect to the best model.

For the best model, we calculated two parameters: the mutation-scaled effective immigration rate (*M*) and the mutation-scaled effective population size *Theta*. The parameter *M* expresses how much more important immigration is for the population relative to mutation. Additionally, we calculated the number of immigrants (*N*m) in the receiving population as follows: *x* × *N*m = *Theta* × *M*. For mtDNA data and assuming a sex ratio of 1:1 we can consider that the inheritance scalar *x* equals to 1. The static heating option with the standard four chains, interval one and the heating scheme suggested by default was employed. We used 100 randomly picked individuals from the compared populations to avoid potential problems derived from the large and uneven sample sizes of the datasets. The length of the MCMC chain as well as the range of the M and theta priors were tuned until convergence was reached for all parameters and no priors boundary problems were detected. We carried out 10 replicates per run. We finally checked the convergence of the runs using the *mtraceR* package for R software (Pacioni et al. 2015) that aims to help in the diagnostics of Bayes MCMC analysis run with Migrate-n.

**Maps of haplogroup interpolated frequencies and genetic distances**

The spatial representation of the B2 sub-haplogroup frequencies was obtained using SAGA v. 4.0.1 (http://www.saga-gis.org/) (Conrad et al. 2015). We used the ordinary Kriging method for interpolating haplogroup frequencies. We took into account only CR samples from population studies (**Supplemental Table S2; Supplemental Table S10**) as well as the Native American fraction of each population sample to obtain haplogroup frequencies.

IBS and F*ST* distances obtained from autosomal data were also displayed in geographic interpolated maps using the same procedure. Moreover, we used SAGA to carry out the kernel density analysis from the archaeological data published by Goldberg et at. (2016) through the Gaussian kernel method and using a radius of 660 km as in Goldberg et al. (2016). The shapefiles and raster maps in the background were taken and adapted from the public domain www.naturalearthdata.com.

**References**

Afonso-Costa H, Carvalho M, Lopes V, Balsa F, Bento AM, Serra A, Andrade L, Anjos MJ, Vide MC, Pantoja S et al. 2010. Mitochondrial DNA sequence analysis of a native Bolivian population. *J Forensic Leg Med* **17**: 247-253.

Álvarez-Iglesias V, Jaime JC, Carracedo Á, Salas A. 2007. Coding region mitochondrial DNA SNPs: targeting East Asian and Native American haplogroups. *Forensic Sci Int Genet* **1**: 44-55.

Álvarez-Iglesias V, Mosquera-Miguel A, Cerezo M, Quintáns B, Zarrabeitia MT, Cuscó I, Lareu MV, García O, Pérez-Jurado L, Carracedo Á et al. 2009. New population and phylogenetic features of the internal variation within mitochondrial DNA macro-haplogroup R0. *PLoS One* **4**: e5112.

Andrews RM, Kubacka I, Chinnery PF, Lightowlers RN, Turnbull DM, Howell N. 1999. Reanalysis and revision of the Cambridge reference sequence for human mitochondrial DNA. *Nat Genet* **23**: 147.

Bandelt HJ, Quintana-Murci L, Salas A, Macaulay V. 2002. The fingerprint of phantom mutations in mitochondrial DNA data. *Am J Hum Genet* **71**: 1150-1160.

Barbieri C, Heggarty P, Castri L, Luiselli D, Pettener D. 2011. Mitochondrial DNA variability in the Titicaca basin: Matches and mismatches with linguistics and ethnohistory. *Am J Hum Biol* **23**: 89-99.

Barbieri C, Heggarty P, Yang Yao D, Ferri G, De Fanti S, Sarno S, Ciani G, Boattini A, Luiselli D, Pettener D. 2014. Between Andes and Amazon: the genetic profile of the Arawak-speaking Yanesha. *Am J Phys Anthropol* **155**: 600-609.

Beerli P. 2006. Comparison of Bayesian and maximum-likelihood inference of population genetic parameters. *Bioinformatics* **22**: 341-345.

Beerli P, Felsenstein J. 1999. Maximum-likelihood estimation of migration rates and effective population numbers in two populations using a coalescent approach. *Genetics* **152**: 763-773.

Beerli P, Palczewski M. 2010. Unified framework to evaluate panmixia and migration direction among multiple sampling locations. *Genetics* **185**: 313-326.

Behar DM, van Oven M, Rosset S, Metspalu M, Loogvali EL, Silva NM, Kivisild T, Torroni A, Villems R. 2012. A "Copernican" reassessment of the human mitochondrial DNA tree from its root. *Am J Hum Genet* **90**: 675-684.

Bobillo MC, Zimmermann B, Sala A, Huber G, Rock A, Bandelt H-J, Corach D, Parson W. 2010. Amerindian mitochondrial DNA haplogroups predominate in the population of Argentina: towards a first nationwide forensic mitochondrial DNA sequence database. *Int J Legal Med* **74**: 65-76.

Cardoso S, Palencia-Madrid L, Valverde L, Alfonso-Sanchez MA, Gomez-Perez L, Alfaro E, Bravi CM, Dipierri JE, Pena JA, de Pancorbo MM. 2013. Mitochondrial DNA control region data reveal high prevalence of Native American lineages in Jujuy province, NW Argentina. *Forensic Sci Int Genet* **7**: e52-55.

Cerezo M, Bandelt H-J, Martín-Guerrero I, Ardanaz M, Vega A, Carracedo Á, García-Orad A, Salas A. 2009. High mitochondrial DNA stability in B-cell chronic lymphocytic leukemia. *PLoS One* **4**: e7902.

Conrad O, Bechtel B, Bock M, Dietrich H, Fischer E, Gerlitz L, Wehberg J, Wichmann V, Böhner J. 2015. System for automated geoscientific analyses (SAGA) v. 2.1. 4. *Geoscientific Model Development* **8**: 1991-2007.

Drummond AJ, Rambaut A. 2007. BEAST: Bayesian evolutionary analysis by sampling trees. *BMC Evol Biol* **7**: 214.

Excoffier L, Lischer HEL. 2010. Arlequin suite ver 3.5: A new series of programs to perform population genetics analyses under Linux and Windows. *Mol Ecol Res* **10**: 564-567.

Fuselli S, Tarazona-Santos E, Dupanloup I, Soto A, Luiselli D, Pettener D. 2003. Mitochondrial DNA diversity in South America and the genetic history of Andean highlanders. *Mol Biol Evol* **20**: 1682-1691.

Goldberg A, Mychajliw AM, Hadly EA. 2016. Post-invasion demography of prehistoric humans in South America. *Nature* **532**: 232-235.

Gómez-Carballa A, Cerezo M, Balboa E, Heredia C, Castro-Feijoo L, Rica I, Barreiro J, Eiris J, Cabanas P, Martínez-Soto I et al. 2011. Evolutionary analyses of entire genomes do not support the association of mtDNA mutations with Ras/MAPK pathway syndromes. *PLoS One* **6**: e18348.

Gómez-Carballa A, Olivieri A, Behar DM, Achilli A, Torroni A, Salas A. 2012. Genetic continuity in the Franco-Cantabrian region: New clues from autochthonous mitogenomes. *PLoS One* **7**: e32851.

Heled J, Drummond AJ. 2008. Bayesian inference of population size history from multiple loci. *BMC Evol Biol* **8**: 289.

Kong QP, Bandelt HJ, Sun C, Yao YG, Salas A, Achilli A, Wang CY, Zhong L, Zhu CL, Wu SF et al. 2006. Updating the East Asian mtDNA phylogeny: a prerequisite for the identification of pathogenic mutations. *Hum Mol Genet* **15**: 2076-2086.

Kumar S, Stecher G, Tamura K. 2016. MEGA7: Molecular Evolutionary Genetics Analysis Version 7.0 for Bigger Datasets. *Mol Biol Evol* **33**: 1870-1874.

Llamas B, Fehren-Schmitz L, Valverde G, Soubrier J, Mallick S, Rohland N, Nordenfelt S, Valdiosera C, Richards SM, Rohrlach A et al. 2016. Ancient mitochondrial DNA provides high-resolution time scale of the peopling of the Americas. *Sci Adv* **2**: e1501385.

Pacioni C, Hunt H, Allentoft ME, Vaughan TG, Wayne AF, Baynes A, Haouchar D, Dortch J, Bunce M. 2015. Genetic diversity loss in a biodiversity hotspot: ancient DNA quantifies genetic decline and former connectivity in a critically endangered marsupial. *Mol Ecol* **24**: 5813-5828.

Posada D. 2008. jModelTest: phylogenetic model averaging. *Mol Biol Evol* **25**: 1253-1256.

R core development team. 2011. R: A Language and Enviroment for Statistical Computing. R Foundation for Statistical Computing, Vienna, Austria.

Reich D, Patterson N, Campbell D, Tandon A, Mazieres S, Ray N, Parra MV, Rojas W, Duque C, Mesa N et al. 2012. Reconstructing Native American population history. *Nature* **488**: 370-374.

Salas A, Carracedo A, Macaulay V, Richards M, Bandelt HJ. 2005. A practical guide to mitochondrial DNA error prevention in clinical, forensic, and population genetics. *Biochem Biophys Res Commun* **335**: 891-899.

Sandoval JR, Lacerda DR, Acosta O, Jota MS, Robles-Ruiz P, Salazar-Granara A, Vieira PP, Paz YMC, Fujita R, Santos FR et al. 2016. The genetic history of Peruvian Quechua-Lamistas and Chankas: Uniparental DNA patterns among autochthonous Amazonian and Andean populations. *Ann Hum Genet* **80**: 88-101.

Soares P, Ermini L, Thomson N, Mormina M, Rito T, Rohl A, Salas A, Oppenheimer S, Macaulay V, Richards MB. 2009. Correcting for purifying selection: an improved human mitochondrial molecular clock. *Am J Hum Genet* **84**: 740-759.

Taboada-Echalar P, Álvarez-Iglesias V, Heinz T, Vidal-Bralo L, Gómez-Carballa A, Catelli L, Pardo-Seco J, Pastoriza A, Carracedo Á, Torres-Balanza A et al. 2013. The genetic legacy of the pre-Colonial period in contemporary Bolivians. *PLoS One* **8**: e58980.

The 1000 Genomes Project Consortium. 2012. An integrated map of genetic variation from 1,092 human genomes. *Nature* **491**: 56-65.

Torroni A, Rengo C, Guida V, Cruciani F, Sellitto D, Coppa A, Calderon FL, Simionati B, Valle G, Richards M et al. 2001. Do the four clades of the mtDNA haplogroup L2 evolve at different rates? *Am J Hum Genet* **69**: 1348-1356.

van Oven M, Kayser M. 2009. Updated comprehensive phylogenetic tree of global human mitochondrial DNA variation. *Hum Mutat* **30**: E386-E394.

**Supplemental Figures**

**Supplemental Figure S1.** MDS of Native American samples from South America vs. other reference populations from Africa and Europe taken from 1000G. In the case of PEL-1000G, only individual profiles that passed the masking filter were included.

**
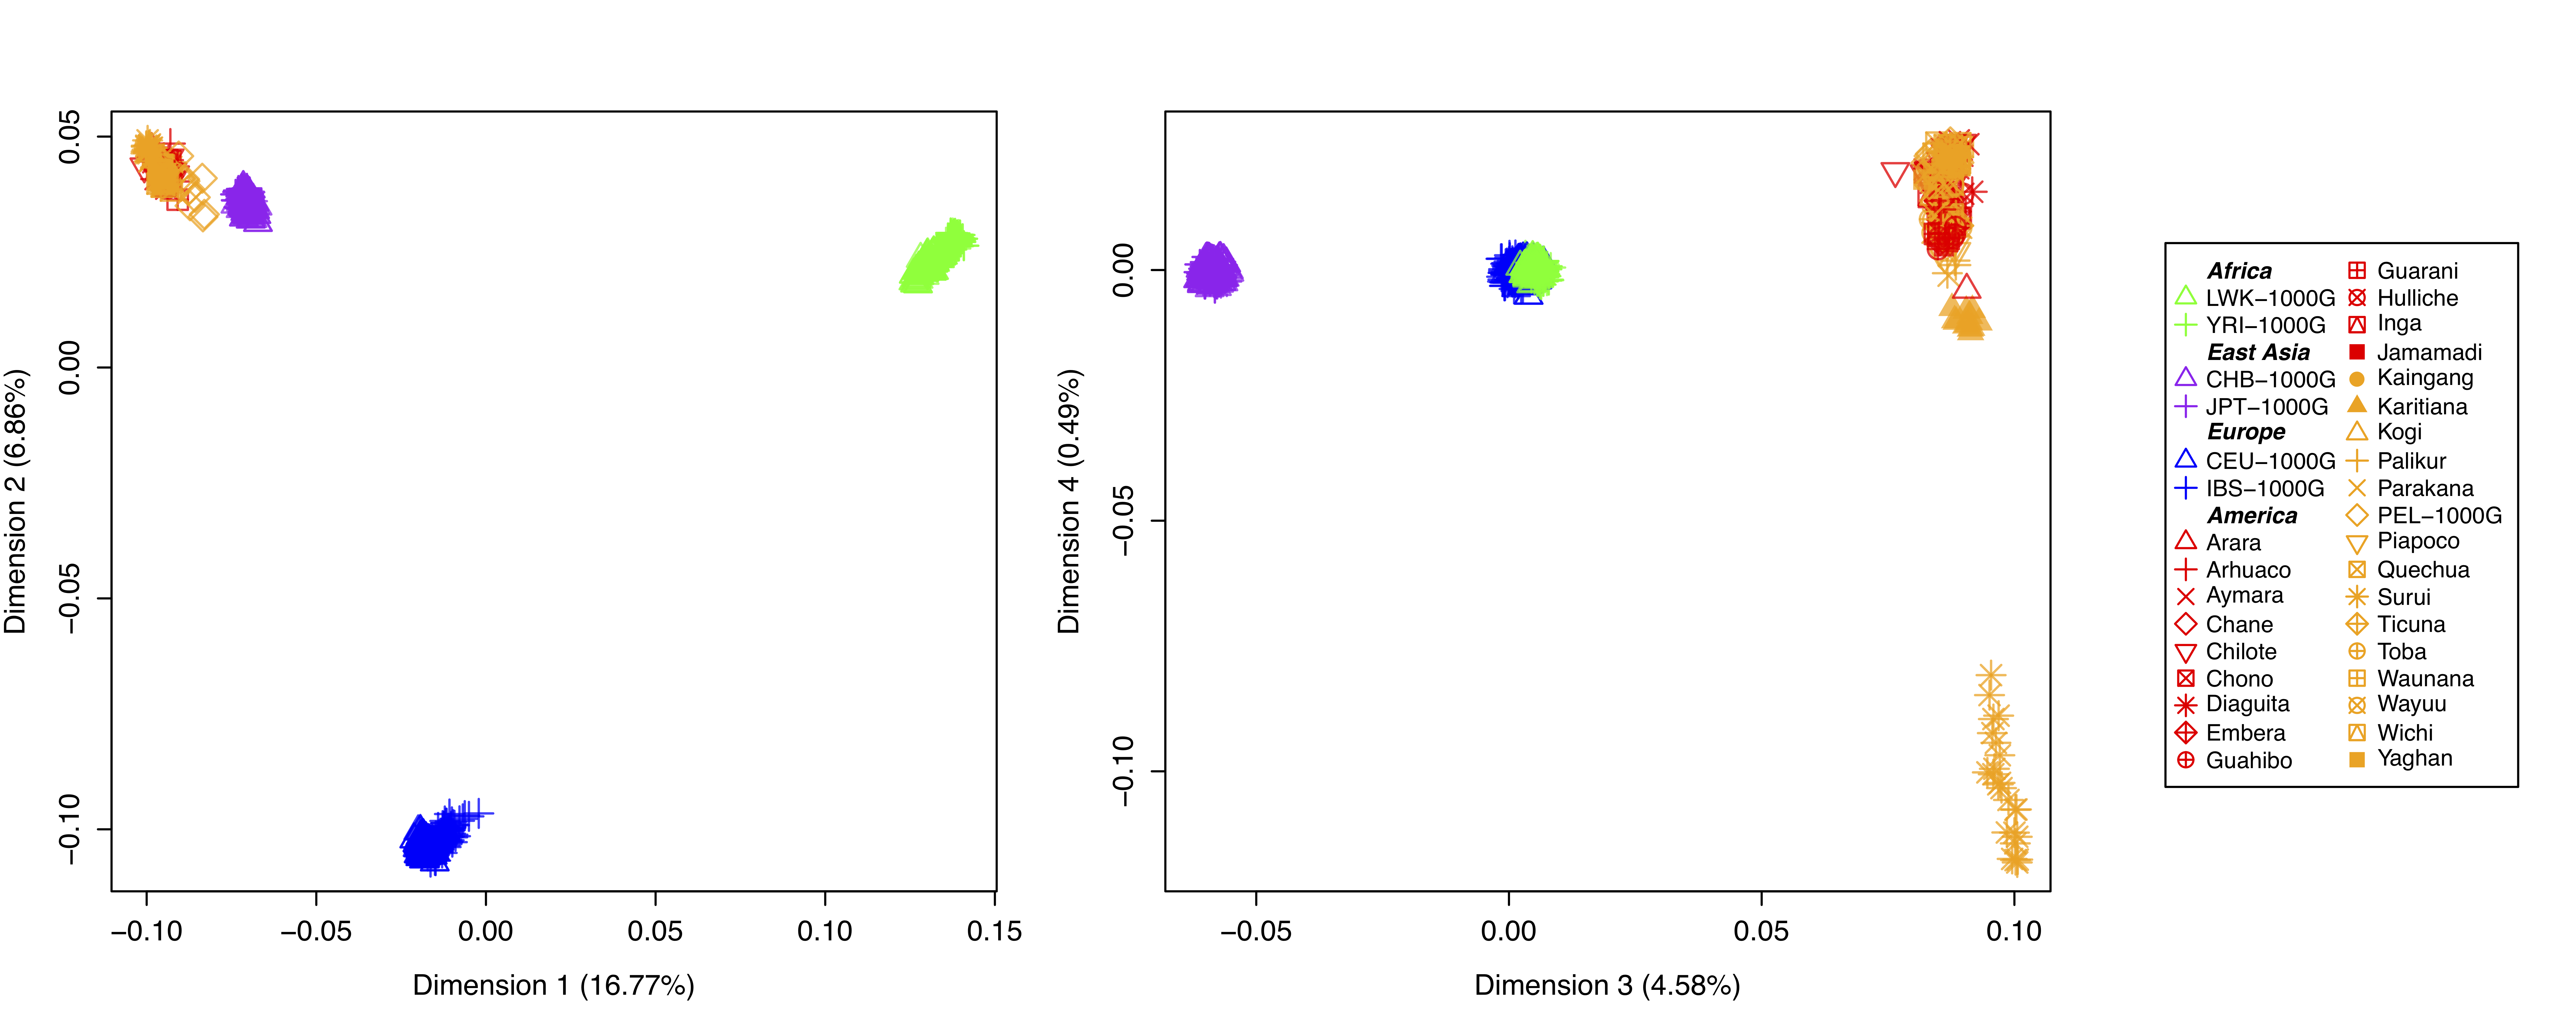
**

**Supplemental Figure S2.** MDS of Native American samples from South America.

**Supplemental Figure S3.** Map of interpolated IBS values between Peruvians and other Native American samples from South America. Dots indicate sample geographical sources.

**Supplemental Figure S4.** EBSP for haplogroup B2b3 obtained from HVS-I data. Generation time (g) is expressed in years because calibration uses a fixed mutation rate (that is expressed in mutations/site/year).

**Supplemental Tables.**

**Supplemental Table S1.** Diversity indices (modern and ancient samples) for B2 sub-haplogroups in different geographic areas.

| **Modern Samples** | | | | | | | |
| --- | --- | --- | --- | --- | --- | --- | --- |
| **Haplogroup** | **Region** | ***n*** | ***h*** | ***S*** | ***HD*** | ***M*** | ***π*** |
| **B2ai** | **Argentina** | 3 | 3 | 3 | ﻿0.8377 ± 0.0398 | ﻿1.500000 ± 1.120934 | ﻿0.005495 ± 0.004903 |
|  | **Bolivia** | 55 | 15 | 14 | ﻿0.8377 ± 0.0398 | ﻿ 1.423569 ± 0.883014 | 0.005215 ± 0.003588 |
|  | **Peru** | 83 | 23 | 22 | ﻿0.7426 ± 0.0500 | ﻿1.284749 ± 0.814551 | ﻿0.004706 ± 0.003306 |
|  | **Brazil** | - | - | - | - | - | - |
|  | **Chile** | 4 | 3 | 2 | 0.8333 ± 0.2224 | 1.000000 ± 0.829646 | 0.003663 ± 0.003629 |
|  | **Puerto Rico** | - | - | - | - | - | - |
| **B2aj** | **Argentina** | 62 | 7 | 7 | ﻿0.2692 ± 0.0739 | ﻿0.349551 ± 0.347394 | ﻿0.001280 ± 0.001411 |
|  | **Bolivia** | 253 | 27 | 27 | ﻿0.5227 ± 0.0379 | ﻿0.728277 ± 0.544950 | ﻿0.002668 ± 0.002208 |
|  | **Peru** | 142 | 21 | 20 | ﻿0.7530 ± 0.0326 | ﻿1.303366 ± 0.819785 | ﻿0.004774 ± 0.003324 |
|  | **Brazil** | - | - | - | - | - | - |
|  | **Chile** | 23 | 9 | 9 | ﻿0.7233 ± 0.0960 | ﻿1.011858 ± 0.704620 | ﻿0.003706 ± 0.002878 |
|  | **Puerto Rico** | - | - | - | - | - | - |
| **B2b3** | **Argentina** | 3 | 3 | 3 | ﻿1.0000 ± 0.2722 | ﻿2.000000 ± 1.511858 | ﻿0.007326 ± 0.006907 |
|  | **Bolivia** | - | - | - | - | - | - |
|  | **Peru** | - | - | - | - | - | - |
|  | **Brazil** | 52 | 13 | 13 | ﻿0.8318 ± 0.0316 | ﻿1.577677 ± 0.954610 | ﻿0.005779 ± 0.003880 |
|  | **Chile** | - | - | - | - | - | - |
|  | **Puerto Rico** | 21 | 2 | 1 | ﻿0.1810 ± 0.1044 | ﻿0.180952 ± 0.244364 | ﻿0.000663 ± 0.000999 |
| **B2b11** | **Argentina** | - | - | - | - | - | - |
|  | **Bolivia** | - | - | - | - | - | - |
|  | **Peru** | 19 | 10 | 10 | ﻿0.9064 ± 0.0446 | ﻿ 1.836257 ± 1.102943 | ﻿0.006726 ± 0.004515 |
|  | **Brazil** | - | - | - | - | - | - |
|  | **Chile** | - | - | - | - | - | - |
|  | **Puerto Rico** | - | - | - | - | - | - |
| **B2b14** | **Argentina** | 2 | 2 | 3 | 1.0000 ± 0.5000 | 3.000000 ± 2.449490 | 0.010989 ± 0.012689 |
|  | **Bolivia** | 21 | 4 | 5 | ﻿0.4810 ± 0.1212 | ﻿1.133333 ± 0.766237 | ﻿0.004151 ± 0.003133 |
|  | **Peru** | 16 | 7 | 5 | ﻿0.8000 ± 0.0898 | ﻿ 1.583333 ± 0.992745 | ﻿0.005800 ± 0.004073 |
|  | **Brazil** | - | - | - | - | - | - |
|  | **Chile** | - | - | - | - | - | - |
|  | **Puerto Rico** | - | - | - | - | - | - |
| **B2y** | **Argentina** | 27 | 8 | 8 | ﻿0.6439 ± 0.1004 | ﻿ 1.732194 ± 1.040488 | ﻿0.006345 ± 0.004245 |
|  | **Bolivia** | 15 | 7 | 5 | 0.8381 ± 0.0680 | 1.371429 ± 0.894593 | 0.005024 ± 0.003674 |
|  | **Peru** | 42 | 13 | 11 | 0.6969 ± 0.0781 | 1.291521 ± 0.825683 | 0.004731 ± 0.003359 |
|  | **Brazil** | 5 | 1 | 0 | 0.0000 ± 0.0000 | 0.000000 ± 0.000000 | 0.000000 ± 0.000000 |
|  | **Chile** | 2 | 2 | 3 | 1.0000 ± 0.5000 | 3.000000 ± 2.449490 | 0.010989 ± 0.012689 |
|  | **Puerto Rico** | - | - | - | - | - | - |
| **Ancient Samples** | | | | | | | |
| ***Haplogroup*** | ***Region*** | ***n*** | ***h*** | ***S*** | ***HD*** | ***M*** | ***π*** |
| **B2ai** | **Argentina** | - | - | - | - | - | - |
|  | **Bolivia** | - | - | - | - | - | - |
|  | **Peru** | 21 | 5 | 5 | ﻿0.6143 ± 0.0897 | ﻿0.6143 ± 0.0897 | ﻿0.002965 ± 0.002479 |
| **B2aj** | **Argentina** | 2 | 1 | 0 | ﻿ 0.0000 ± 0.0000 | ﻿ 0.0000 ± 0.0000 | ﻿ 0.0000 ± 0.0000 |
|  | **Bolivia** | 2 | 2 | 1 | ﻿ 1.0000 ± 0.5000 | ﻿1.000000 ± 1.000000 | ﻿0.003663 ± 0.005180 |
|  | **Peru** | - | - | - | - | - | - |
| **B2b3** | **Argentina** | - | - | - | - | - | - |
|  | **Bolivia** | - | - | - | - | - | - |
|  | **Peru** | - | - | - | - | - | - |
| **B2b11** | **Argentina** | - | - | - | - | - | - |
|  | **Bolivia** | - | - | - | - | - | - |
|  | **Peru** | - | - | - | - | - | - |
| **B2b14** | **Argentina** | - | - | - | - | - | - |
|  | **Bolivia** | - | - | - | - | - | - |
|  | **Peru** | 4 | 1 | 0 | ﻿ 0.0000 ± 0.0000 | ﻿ 0.0000 ± 0.0000 | ﻿ 0.0000 ± 0.0000 |
| **B2y** | **Argentina** | - | - | - | - | - | - |
|  | **Bolivia** | - | - | - | - | - | - |
|  | **Peru** | 11 | 5 | 4 | ﻿0.7091 ± 0.1366 | ﻿1.200000 ± 0.828079 | ﻿0.004396 ± 0.003422 |

**Supplemental Table S3.** Andeanmigration models and their probabilities. Θ = mutation scale population sizes; M = mutation scale immigration rates (sub-indexes are: P = Peru; B = Bolivia; A_NW = North-western Argentina; the number of immigrants per generation or *Nm* is given in brackets).

| **Tested Model** | **lmL** | **LBF** | **Prob.** | **Rank** | **ΘP** | **ΘB** | **ΘA_NW** | **MP→B** | **MB→A_NW** | **MA_NW→B** |
| --- | --- | --- | --- | --- | --- | --- | --- | --- | --- | --- |
|  | -2679.323 | 0.00 | 0.825 | 1 | 0.09150 | 0.18850 | 0.23183 | 847.3  (159.6) | 1407.3  (326.2) | – |
|  | -2680.099 | -1.55 | 0.175 | 2 | 0.09183 | 0.18350 | 0.24217 | 944.7  (173.3) | 1634.0  (395.7) | 0.7  (0.13) |
|  | -2686.452 | -14.26 | 0.000 | 3 | – | – | – | – | – | – |
|  | -2692.326 | -26.01 | 0.000 | 4 | – | – | – | – | – | – |
|  | -2697.569 | -36.49 | 0.000 | 5 | – | – | – | – | – | – |
|  | -2707.846 | -57.05 | 0.000 | 6 | – | – | – | – | – | – |
|  | -2712.260 | -65.88 | 0.000 | 7 | – | – | – | – | – | – |
|  | -2714.026 | -69.41 | 0.000 | 8 | – | – | – | – | – | – |
|  | -2733.546 | -108.45 | 0.000 | 9 | – | – | – | – | – | – |

**Supplemental Table S4.** Migration models from/to northern Argentina and their probabilities. Θ = mutation scale population sizes; M = mutation scale immigration rates (sub-indexes are B = Bolivia; A_NW = North-western Argentina; A_NE = North-eastern Argentina; the number of immigrants per generation or *Nm* is given in brackets).

| **Tested Model** | **lmL** | **LBF** | **Prob.** | **Rank** | **ΘB** | **ΘA_NW** | **ΘA_NE** | **MB→A_NW** | **MA_NW→A_NE** |
| --- | --- | --- | --- | --- | --- | --- | --- | --- | --- |
|  | -2049.604 | 0.00 | 1.00 | 1 | 0.0645 | 0.2535 | 0.0715 | 776.7 (196.9) | 351.3 (25.11) |
|  | -2053.951 | -8.69 | 0.00 | 2 | − | − | − | − | − |
|  | -2058.594 | -17.98 | 0.00 | 3 | − | − | − | − | − |
|  | -2097.111 | -95.01 | 0.00 | 4 | − | − | − | − | − |
|  | -2360.480 | -621.75 | 0.00 | 5 | − | − | − | − | − |

**Supplemental Table S8.** ML TMRCA estimates for B2 clades and sub-clades. The number of ancient mitogenomes is reported in brackets.

| **Clade** | ***n*** | **Age (ky) ± SD** |
| --- | --- | --- |
| B2b | 190 (11) | 16.60 ± 0.95 |
| B2b14 | 7 | 12.79 ± 1.84 |
| B2b14a | 7 | 4.10 ± 3.23 |
| B2b14a1 | 3 | 1.64 ± 3.35 |
| B2b14b | 3 | 8.17 ± 1.96 |
| B2b14b1 | 2 | 3.48 ± 1.00 |
| B2b3 | 13 | 15.85 ± 1.01 |
| B2b3a | 9 | 8.29 ± 1.26 |
| B2b3a2 | 3 | 3.87 ± 1.24 |
| B2b3a1 | 9 | 6.89 ± 1.35 |
| B2b3a1a | 8 | 5.97 ± 0.88 |
| B2b3a1a1 | 6 | 4.04 ± 0.75 |
| B2b11 | 17 (4) | 14.70 ± 1.17 |
| B1b11a | 9 (3) | 13.28 ± 1.23 |
| B2b11a2 | 3 (3) | 2.85 ± 0.88 |
| B2b11a2a | 2 (2) | 1.41 ± 0.49 |
| B2b11a1 | 6 | 10.82 ± 1.36 |
| B2b11a1a | 5 | 9.07 ± 1.40 |
| B2b11a1a1 | 4 | 3.44 ± 1.43 |
| B2b11b | 4 | 11.26 ± 1.83 |
| B2b11b1 | 3 | 8.34 ± 1.83 |
| B2b11b1a | 2 | 1.94 ± 0.85 |
| B2aj | 54 | 10.43 ± 1.33 |
| B2aj1 | 28 (2) | 8.03 ± 1.23 |
| B2aj1a | 27 (2) | 3.58 ± 0.53 |
| B2aj1a1 | 7 | 2.81 ± 0.73 |
| B2aj1a1a | 6 | 0.77 ± 0.82 |
| B2aj1a2 | 3 | 2.05 ± 0.61 |
| B2aj2 | 2 | 3.61 ± 1.33 |
| B2aj3 | 14 | 7.91 ± 1.62 |
| B2aj3a | 8 | 3.35 ± 0.63 |
| B2aj3b | 3 | 4.51 ± 1.29 |
| B2aj3c | 3 | 5.20 ± 1.37 |
| B2aj4 | 10 | 9.17 ± 1.55 |
| B2aj4a | 9 | 8.03 ± 1.42 |
| B2aj4a1 | 6 | 5.98 ± 1.04 |
| B2aj4a1a | 3 | 3.74 ± 0.76 |
| B2aj4a1a1 | 2 | 2.78 ± 0.66 |
| B2aj4a1b | 2 | 2.78 ± 3.02 |
| B4aj4a2 | 2 | 1.67 ± 0.62 |
| B2ai | 34 (2) | 8.45 ± 0.69 |
| B2ai1 | 5 | 7.51 ± 0.75 |
| B2ai1a | 4 | 6.65 ± 0.80 |
| B2ai1a1 | 2 | 5.61 ± 0.94 |
| B2ai2 | 4 (1) | 6.71 ± 0.99 |
| B2ai2a | 3 (1) | 4.80 ± 0.91 |
| B2ai3 | 2 | 2.24 ± 0.79 |
| B2ai4 | 2 | 6.81 ± 0.95 |
| B2y | 18 (2) | 14.35 ± 1.33 |
| B2y3 | 2 | 8.64 ± 2.11 |
| B2y1 | 2 | 10.48 ± 1.95 |
| B2y2 | 10 (2) | 13.52 ± 1.36 |
| B2y2a | 9 (2) | 12.59 ± 1.30 |
| B2y2a1 | 4 (2) | 10.20 ± 1.41 |
| B2y2a1a | 2 | 6.61 ± 1.27 |
| B2y2a2 | 4 | 4.41 ± 1.33 |
| B2y2a2a | 3 | 0.74 ± 0.38 |

**Supplemental Table S9.** Reference populations used for the analyses of autosomal SNPs.

| **Population** | **Language family** | **Country** | ***n*** | **Reference** |
| --- | --- | --- | --- | --- |
| *Native American populations* | | | | |
| Arara | Ge‐Pano‐Carib | Brazil | 1 | (Reich et al. 2012) |
| Arhuaco | Chibchan‐Paezan | Colombia | 5 | (Reich et al. 2012) |
| Aymara | Andean | Bolivia/Chile | 23 | (Reich et al. 2012) |
| Chane | Equatorial‐Tucanoan | Argentina | 2 | (Reich et al. 2012) |
| Chilote | Andean | Chile | 8 | (Reich et al. 2012) |
| Chono | Andean | Chile | 4 | (Reich et al. 2012) |
| Diaguita | Andean | Argentina | 5 | (Reich et al. 2012) |
| Embera | Chibchan‐Paezan | Colombia | 5 | (Reich et al. 2012) |
| Guahibo | Equatorial‐Tucanoan | Colombia | 6 | (Reich et al. 2012) |
| Guarani | Equatorial‐Tucanoan | Paraguay/Argentina | 6 | (Reich et al. 2012) |
| Hulliche | Andean | Chile | 4 | (Reich et al. 2012) |
| Inga | Andean | Colombia | 9 | (Reich et al. 2012) |
| Jamamadi | Equatorial‐Tucanoan | Brazil | 1 | (Reich et al. 2012) |
| Kaingang | Ge‐Pano‐Carib | Brazil | 2 | (Reich et al. 2012) |
| Karitiana | Equatorial‐Tucanoan | Brazil | 13 | (Reich et al. 2012) |
| Kogi | Chibchan‐Paezan | Colombia | 4 | (Reich et al. 2012) |
| Palikur | Equatorial‐Tucanoan | French Guiana | 3 | (Reich et al. 2012) |
| Parakana | Equatorial‐Tucanoan | Brazil | 1 | (Reich et al. 2012) |
| Piapoco | Equatorial‐Tucanoan | Colombia | 7 | (Reich et al. 2012) |
| Quechua | Andean | Bolivia/Perú | 40 | (Reich et al. 2012) |
| Surui | Equatorial‐Tucanoan | Brazil | 24 | (Reich et al. 2012) |
| Ticuna | Equatorial‐Tucanoan | Colombia | 6 | (Reich et al. 2012) |
| Toba | Ge‐Pano‐Carib | Argentina | 4 | (Reich et al. 2012) |
| Waunana | Chibchan‐Paezan | Colombia | 3 | (Reich et al. 2012) |
| Wayuu | Equatorial‐Tucanoan | Colombia | 11 | (Reich et al. 2012) |
| Wichi | Ge‐Pano‐Carib | Argentina | 5 | (Reich et al. 2012) |
| Yaghan | Andean | Chile | 4 | (Reich et al. 2012) |
| PEL-1000G* | – | Peru | 11 | (The 1000 Genomes Project Consortium 2012) |
| Sub-Total |  |  | 217 |  |
| *Reference populations* | | | | |
| IBS-1000G | – | Spain | 107 | (The 1000 Genomes Project Consortium 2012) |
| CEU-1000G | – | USA European ancestry | 207 | (The 1000 Genomes Project Consortium 2012) |
| YRI-1000G | – | Nigeria | 216 | (The 1000 Genomes Project Consortium 2012) |
| LKW-1000G | – | Kenya | 172 | (The 1000 Genomes Project Consortium 2012) |
| JPT-1000G | – | Japan | 189 | (The 1000 Genomes Project Consortium 2012) |
| CHB-1000G | – | China | 185 | (The 1000 Genomes Project Consortium 2012) |
| Sub-Total |  |  | 1076 |  |
| **TOTAL** |  |  | **1293** |  |

* Only individual profiles that passed the masking filter were included.
