# Supplementary material for: The peopling of South America and the trans-Andean gene flow of the first settlers
Source: HighWire-hosted journal article supplement (doi:10.1101/gr.234674.118), 2018-05-07
Supplement: Supplemental_Table_S7.xlsx [file Supplemental_Table_S7.xlsx]

## Sheet: Supplemental Table S7
Supplemental Table S7. List of the 570 mitogenomes used, together with the 72 B2 mitogenomes newly obtained in this study, for the ML analysis.
Genbank ID	1000Genomes ID	Haplogroup	Country	Region	Ethnicity	Date calibration (ya)
KU523271	―	A2	Peru	―	Ancient sample	4,000
EU095196	―	A2aa	Brazil	―	Waiwai	―
EU095201	―	A2aa	Brazil	―	Poturujara	―
JX669159	―	A2aa	Peru	―	―	―
JX669408	―	A2aa	Peru	―	―	―
JX669420	―	A2aa	Peru	―	―	―
JX669421	―	A2aa	Peru	―	―	―
JX669422	―	A2aa	Peru	―	―	―
JQ702750	―	A2aa	Spain	―	―	―
KJ923839	―	A2ac	Colombia	―	―	―
KJ923840	―	A2ac	Colombia	―	―	―
EU095529	―	A2ac	Ecuador	―	Cayapa	―
KY680794	―	A2ac	Ecuador	Cotopaxi, Pallatanga	Mestizo	―
KY680795	―	A2ac	Ecuador	Chimborazo, Riobamba	Mestizo	―
KY680796	―	A2ac	Ecuador	Pichincha, Quito	Mestizo	―
KY680797	―	A2ac	Ecuador	Carchi	Mestizo	―
KY680798	―	A2ac	Ecuador	Pichincha, Cayambe	Mestizo	―
KY680799	―	A2ac	Ecuador	Pichincha, Quito	Mestizo	―
KY680800	―	A2ac	Ecuador	Pichincha, Mejia	Mestizo	―
KM102053	―	A2ac	USA	―	Hispanic	―
KY681011	―	A2ac	Venezuela	―	―	―
JQ702324	―	A2ac1	Colombia	―	―	―
―	HG01112	A2ac1	Colombia	―	―	―
―	HG01251	A2ac1	Colombia	―	―	―
―	HG01440	A2ac1	Colombia	―	―	―
JQ704789	―	A2ac1	Cuba	―	―	―
KY680801	―	A2ac2	Ecuador	Chimborazo, Penipe	Mestizo	―
KY680802	―	A2ac2	Ecuador	―	Mestizo	―
KY680803	―	A2ac2	Ecuador	Santo Domingo, El Poste	Native Tsàchila	―
KY680804	―	A2ac2	Ecuador	Pichincha, Quito	Mestizo	―
KY680805	―	A2ac2	Ecuador	―	Mestizo	―
KY680806	―	A2ac2	Ecuador	Bolivar, Chimbo	Mestizo	―
KY680822	―	A2ar	Ecuador	Loja	Native	―
KY680823	―	A2ar	Ecuador	―	Mestizo	―
KM051472	―	A2ar	Guatemala	―	―	―
JX669225	―	A2ar	Peru	―	―	―
―	HG01566	A2ar	Peru	―	―	―
JX669211	―	A2as	Peru	―	―	―
KP300790	―	A2as	Peru	―	Ancient sample	7,756±31
KU523274	―	A2as	Peru	―	Ancient sample	550±50
JX669216	―	A2as1	Peru	―	―	―
JX669320	―	A2as1	Peru	―	―	―
JX669352	―	A2as1	Peru	―	―	―
JX669182	―	A2at	Peru	―	―	―
JX669304	―	A2at	Peru	―	―	―
JX669206	―	A2at1	Peru	―	―	―
JX669262	―	A2at1	Peru	―	―	―
JX669289	―	A2at1	Peru	―	―	―
JX669312	―	A2at1	Peru	―	―	―
JX669326	―	A2at1	Peru	―	―	―
JX669336	―	A2at1	Peru	―	―	―
KU523265	―	A2at1	Peru	―	Ancient sample	1,264±750
KU523266	―	A2at1	Peru	―	Ancient sample	1,328±38
JX669170	―	A2au	Peru	―	―	―
JX669199	―	A2au	Peru	―	―	―
JX669292	―	A2au	Peru	―	―	―
JX669328	―	A2au	Peru	―	―	―
JX669384	―	A2au	Peru	―	―	―
DQ282389	―	A2av	USA	―	Hispanic	―
KY680813	―	A2av1	Ecuador	―	Mestizo	―
KY680817	―	A2av1	Ecuador	Pichincha, Quito	Mestizo	―
KY680818	―	A2av1	Ecuador	El Oro, Zaruma	Mestizo	―
JX669144	―	A2av1	Peru	―	―	―
JX669272	―	A2av1	Peru	―	―	―
JX669295	―	A2av1	Peru	―	―	―
KY680814	―	A2av1a	Ecuador	Tungurahua, Pillaro	Native Panzaleo	―
KY680815	―	A2av1a	Ecuador	Tungurahua, Ambato	Mestizo	―
KY680816	―	A2av1a	Ecuador	Chimborazo, Riobamba	Mestizo	―
KY680819	―	A2aw	Ecuador	Carchi, Tulcan	Mestizo	―
KY680820	―	A2aw	Ecuador	Carchi, Montùfar San Gabriel	Mestizo	―
KY680821	―	A2aw	Ecuador	Carchi, Montùfar San Gabriel	Native Cayambe	―
KY680809	―	A2k	Ecuador	―	Mestizo	―
KY680810	―	A2k	Ecuador	Pichincha, Manabì	Mestizo	―
KY680811	―	A2k	Ecuador	Pichincha, Guallabamba	Mestizo	―
KY680812	―	A2k	Ecuador	Los Rio, Quevedo	Native Salasaca	―
HQ012058	―	A2k	Mexico	―	―	―
HQ012071	―	A2k	Mexico	―	―	―
JN419250	―	A2k	Mexico	―	―	―
EU095552	―	A2k1	―	―	Wayuu	―
―	HG01085	A2k1	Peru	―	―	―
―	HG01105	A2k1	Peru	―	―	―
DQ282417	―	A2k1	USA	―	Hispanic	―
JQ702172	―	A2k1a	―	―	―	―
―	HG00637	A2k1a	Peru	―	―	―
―	HG01082	A2k1a	Peru	―	―	―
―	HG01097	A2k1a	Peru	―	―	―
―	HG01104	A2k1a	Peru	―	―	―
―	HG01107	A2k1a	Peru	―	―	―
DQ282390	―	A2k1a	USA	―	Hispanic	―
DQ282400	―	A2k1a	USA	―	Hispanic	―
KY681015	―	A2k1a	Venezuela	―	―	―
JX669315	―	A2y	Peru	―	―	―
GQ398480	―	A2y1	Ecuador	―	Waorani	―
GQ398481	―	A2y1	Ecuador	―	Waorani	―
GQ398482	―	A2y1	Ecuador	―	Waorani	―
GQ398483	―	A2y1	Ecuador	―	Waorani	―
GQ398484	―	A2y1	Ecuador	―	Waorani	―
GQ398485	―	A2y1	Ecuador	―	Waorani	―
GQ398486	―	A2y1	Ecuador	―	Waorani	―
GQ398487	―	A2y1	Ecuador	―	Waorani	―
GQ398488	―	A2y1	Ecuador	―	Waorani	―
GQ398489	―	A2y1	Ecuador	―	Waorani	―
GQ398490	―	A2y1	Ecuador	―	Waorani	―
KY680807	―	A2y1	Ecuador	Chimborazo, La Moya	Mestizo	―
KY680808	―	A2y1	Ecuador	Imbabura, San Rafael	Native Otavalo	―
JX669415	―	A2y1	Peru	―	―	―
―	HG00736	A2z1	Peru	―	―	―
JQ705069	―	A2z1	Puerto Rico	―	―	―
―	HG00731	A2z1	Puerto Rico	―	―	―
―	HG01083	A2z1	Puerto Rico	―	―	―
DQ282424	―	A2z1	USA	―	Hispanic	―
DQ282425	―	A2z1	USA	―	Hispanic	―
DQ282426	―	A2z1	USA	―	Hispanic	―
DQ282427	―	A2z1	USA	―	Hispanic	―
JQ705380	―	A2z1	USA	―	―	―
KM102071	―	A2z1	USA	―	Hispanic	―
JX669308	―	A2z2	Peru	―	―	―
JX669354	―	A2z2	Peru	―	―	―
JX669357	―	A2z2	Peru	―	―	―
KY680882	―	B2ai1	Peru	―	Mestizo	―
KY680880	―	B2aa	Ecuador	―	Mestizo	―
JX669150	―	B2aa1	Peru	―	―	―
JX669156	―	B2aa1	Peru	―	―	―
JX669235	―	B2aa1	Peru	―	―	―
JX669318	―	B2aa1	Peru	―	―	―
KU523292	―	B2aa1	Peru	―	Ancient sample	509±67
JX669248	―	B2aa1a	Peru	―	―	―
JX669376	―	B2aa1a	Peru	―	―	―
KU523287	―	B2aa1a	Peru	―	Ancient sample	1,639±275
KU523293	―	B2aa1a	Peru	―	Ancient sample	509±67
KU523294	―	B2aa1a	Peru	―	Ancient sample	509±67
KU523297	―	B2aa1a	Peru	―	Ancient sample	779±238
HQ012157	―	B2aa2	Mexico	―	―	―
HQ012174	―	B2aa2	Mexico	―	―	―
JQ705881	―	B2aa2	Mexico	―	―	―
JX669202	―	B2ab	Peru	―	―	―
JX669258	―	B2ab	Peru	―	―	―
KP300794	―	B2ab	Peru	―	Ancient sample	7,871±30
JX669259	―	B2ab1	Peru	―	―	―
JX669290	―	B2ab1	Peru	―	―	―
JX669291	―	B2ab1	Peru	―	―	―
JX669314	―	B2ab1	Peru	―	―	―
JX669360	―	B2ab1	Peru	―	―	―
KU523299	―	B2ab1a	Bolivia	―	Ancient sample	1,300±300
JX669221	―	B2ab1a	Peru	―	―	―
JX669274	―	B2ab1a1	Peru	―	―	―
JX669296	―	B2ab1a1	Peru	―	―	―
JX669383	―	B2ab1a1	Peru	―	―	―
JX669387	―	B2ab1a1	Peru	―	―	―
JX669395	―	B2ab1a1	Peru	―	―	―
JX669396	―	B2ab1a1	Peru	―	―	―
JX669187	―	B2ac	Peru	―	―	―
JX669401	―	B2ac	Peru	―	―	―
JX669413	―	B2ac	Peru	―	―	―
JX669419	―	B2ac	Peru	―	―	―
JX669424	―	B2ac	Peru	―	―	―
JX669400	―	B2ad	Peru	―	―	―
JX669410	―	B2ad	Peru	―	―	―
JX669423	―	B2ad	Peru	―	―	―
JX669198	―	B2ae	Peru	―	―	―
JX669237	―	B2ae	Peru	―	―	―
JX669319	―	B2ae	Peru	―	―	―
JX669240	―	B2ag	Peru	―	―	―
JX669286	―	B2ag	Peru	―	―	―
JX669299	―	B2ag	Peru	―	―	―
JX669300	―	B2ag	Peru	―	―	―
JX669171	―	B2ag1	Peru	―	―	―
JX669245	―	B2ag1	Peru	―	―	―
JX669385	―	B2ag1	Peru	―	―	―
JX669151	―	B2ah	Peru	―	―	―
JX669249	―	B2ah	Peru	―	―	―
JX669283	―	B2ah	Peru	―	―	―
EU095212	―	B2ai	―	―	Quechua	―
―	HG01970	B2ai	Peru	Lima	―	―
JX669175	―	B2ai	Peru	―	―	―
JX669183	―	B2ai	Peru	―	―	―
JX669201	―	B2ai	Peru	―	―	―
JX669220	―	B2ai	Peru	―	―	―
JX669236	―	B2ai	Peru	―	―	―
JX669253	―	B2ai	Peru	―	―	―
JX669271	―	B2ai	Peru	―	―	―
JX669301	―	B2ai	Peru	―	―	―
JX669310	―	B2ai	Peru	―	―	―
JX669339	―	B2ai	Peru	―	―	―
JX669394	―	B2ai	Peru	―	―	―
KU523303	―	B2ai	Peru	Huaca Pucllana	Ancient sample	1639±275
JX669252	―	B2ai1a	Peru	―	―	―
―	HG01973	B2ai1a1	Peru	Lima	―	―
JX669172	―	B2ai2	Peru	―	―	―
KU523308	―	B2ai2a	Peru	Chullpa Botigiriayocc	Ancient sample	800
JX669374	―	B2ai3	Peru	―	―	―
JX669389	―	B2ai3	Peru	―	―	―
JX669190	―	B2ai4	Peru	―	―	―
JX669322	―	B2ai4	Peru	―	―	―
KP172433	―	B2aj1a	Argentina	―	―	―
KU523301	―	B2aj1a	Bolivia	Tiwanaku	Ancient sample	864±69
KU523302	―	B2aj1a	Bolivia	Tiwanaku	Ancient sample	800±200
JX669180	―	B2aj1a1	Peru	―	―	―
―	HG01991	B2aj4a1b	Peru	Lima	―	―
KC503928	―	B2b	Bolivia	―	―	―
EU095210	―	B2b	Brazil	―	Xavante	―
―	HG01437	B2b	Colombia	―	―	―
KY680939	―	B2b	Ecuador	Loja	Mestizo	―
KY680940	―	B2b	Ecuador	Loja	Native	―
KY680941	―	B2b	Ecuador	Loja	Native Saraguro	―
KY680947	―	B2b	Ecuador	Tungurahua	Mestizo	―
KY680948	―	B2b	Ecuador	Pichincha, Perdro Vicente Maldonado	Mestizo	―
JX669137	―	B2b	Peru	―	―	―
JX669155	―	B2b	Peru	―	―	―
JX669161	―	B2b	Peru	―	―	―
JX669179	―	B2b	Peru	―	―	―
JX669181	―	B2b	Peru	―	―	―
JX669200	―	B2b	Peru	―	―	―
JX669208	―	B2b	Peru	―	―	―
JX669213	―	B2b	Peru	―	―	―
JX669267	―	B2b	Peru	―	―	―
JX669279	―	B2b	Peru	―	―	―
JX669298	―	B2b	Peru	―	―	―
JX669375	―	B2b	Peru	―	―	―
KU523280	―	B2b	Peru	―	Ancient sample	1,264±750
EU095208	―	B2b	USA	―	Pomo	―
KM102138	―	B2b	USA	―	Hisp	―
JF431064	―	B2b1	Venezuela	―	―	―
JF431065	―	B2b1	Venezuela	―	―	―
JX669222	―	B2b10a	Peru	―	―	―
JX669340	―	B2b10a	Peru	―	―	―
JX669343	―	B2b10a	Peru	―	―	―
JX669373	―	B2b10a	Peru	―	―	―
JX669302	―	B2b10b	Peru	―	―	―
JX669345	―	B2b10b	Peru	―	―	―
JX669346	―	B2b10b	Peru	―	―	―
JX669351	―	B2b10b	Peru	―	―	―
JX669372	―	B2b10b	Peru	―	―	―
JX669392	―	B2b10b	Peru	―	―	―
JX669224	―	B2b11	Peru	―	―	―
JX669284	―	B2b11	Peru	―	―	―
JX669364	―	B2b11	Peru	―	―	―
KU523282	―	B2b11	Peru	Huaca Pucllana	Ancient sample	853±123
JX669370	―	B2b11a1a	Peru	―	―	―
JX669370	―	B2b11a1a	Peru	―	―	―
―	HG01953	B2b11a1a1	Peru	Lima	―	―
JX669169	―	B2b11a1a1	Peru	―	―	―
JX669270	―	B2b11a1a1	Peru	―	―	―
JX669353	―	B2b11a1a1	Peru	―	―	―
KU523275	―	B2b11a2	Peru	Huaca Pucllana	Ancient sample	744±170
KU523285	―	B2b11a2a	Peru	Huaca Pucllana	Ancient sample	744±170
KU523295	―	B2b11a2a	Peru	Pueblo Viejo	Ancient sample	509±67
JX669321	―	B2b11b	Peru	―	―	―
JX669330	―	B2b11b1	Peru	―	―	―
JX669218	―	B2b11b1a	Peru	―	―	―
JX669391	―	B2b11b1a	Peru	―	―	―
KY680946	―	B2b12a	Ecuador	Morona-Santiago, Yaupi	Native Shuar	―
JX669139	―	B2b12a	Peru	―	―	―
JX669147	―	B2b12a	Peru	―	―	―
JX669168	―	B2b12a	Peru	―	―	―
JX669255	―	B2b12b	Peru	―	―	―
JX669261	―	B2b12b	Peru	―	―	―
JX669323	―	B2b12b	Peru	―	―	―
JX669205	―	B2b13	Peru	―	―	―
JX669230	―	B2b13	Peru	―	―	―
JX669251	―	B2b13	Peru	―	―	―
JX669197	―	B2b14b	Peru	―	―	―
KC503926	―	B2b2	Bolivia	―	―	―
KM102111	―	B2b2	USA	―	Hisp	―
KC503925	―	B2b2a	Bolivia	―	―	―
KC503927	―	B2b2a	Bolivia	―	―	―
EU095221	―	B2b3	Venezuela/Brazil	―	Yanomama	―
―	HG01164	B2b3a1a	Puerto Rico	―	―	―
KM102108	―	B2b3a1a	USA	―	Hispanic	―
―	HG01079	B2b3a1a1	Puerto Rico	―	―	―
―	HG01088	B2b3a1a1	Puerto Rico	―	―	―
―	HG01161	B2b3a1a1	Puerto Rico	―	―	―
―	HG01191	B2b3a1a1	Puerto Rico	―	―	―
―	HG01198	B2b3a1a1	Puerto Rico	―	―	―
―	HG01198	B2b3a1a1	Puerto Rico	―	―	―
EU095216	―	B2b3a2	Brazil	―	Kayapó	―
HQ012137	―	B2b4	Mexico	―	―	―
EU095532	―	B2b5	Ecuador	―	Cayapa	―
KY680884	―	B2b5	Ecuador	Pichincha, Juan Montalvo	Native Cayambe	―
KY680885	―	B2b5	Ecuador	Cotopaxi, Mulalo	Mestizo	―
KY680886	―	B2b5	Ecuador	Pichincha, San Miguel de Los Boncos	Mestizo	―
KY680887	―	B2b5	Ecuador	Imbabura, Ibarra	Mestizo	―
KY680888	―	B2b5	Ecuador	Loja, Oñacapa	Native	―
KY680889	―	B2b5	Ecuador	Pichincha, Quito	Mestizo	―
JX669334	―	B2b5	Peru	―	―	―
KY681013	―	B2b5	Venezuela	―	―	―
KY680893	―	B2b5a	Ecuador	Loja, Oñacapa	Native	―
KY680894	―	B2b5a	Ecuador	―	Native	―
KY680895	―	B2b5a	Ecuador	Loja	Mestizo	―
KY680890	―	B2b5a1	Ecuador	―	Native	―
KY680891	―	B2b5a1	Ecuador	―	Native	―
KY680892	―	B2b5a1	Ecuador	Loja	Mestizo	―
KY680904	―	B2b5b	Ecuador	―	Mestizo	―
KY680905	―	B2b5b	Ecuador	Pichincha	Mestizo	―
JX669325	―	B2b5b1	Peru	―	―	―
KY680896	―	B2b5b1a	Ecuador	Pichicha, Ruminahui	Mestizo	―
KY680897	―	B2b5b1a	Ecuador	Pichincha, Quito	Mestizo	―
KY680903	―	B2b5b1a	Ecuador	―	Mestizo	―
KY680898	―	B2b5b1a1	Ecuador	Pichicha, Ruminahui	Mestizo	―
KY680899	―	B2b5b1a1	Ecuador	Loja, Linderos	Native	―
KY680900	―	B2b5b1a1	Ecuador	Loja, Gañil	Native	―
KY680901	―	B2b5b1a1	Ecuador	Loja, Oñacapa	Native	―
KY680902	―	B2b5b1a1	Ecuador	Bolivar, Piñato	Native Quincha	―
KY680925	―	B2b6a	Ecuador	Loja, Oñacapa	Native	―
KY680906	―	B2b6a1	Ecuador	Pichincha, Quito	Mestizo	―
KY680907	―	B2b6a1	Ecuador	Pichincha, Ruminahui	Mestizo	―
KY680908	―	B2b6a1	Ecuador	Loja, Gañil	Native	―
KY680910	―	B2b6a1	Ecuador	Loja, Gañil	Mestizo	―
KY680923	―	B2b6a1	Ecuador	Cotopxi, Pujili	Mestizo	―
KY680924	―	B2b6a1	Ecuador	Pichincha, Machachi	Native Quitu-Cara/Cayambe	―
JX669148	―	B2b6a1	Peru	―	―	―
JX669152	―	B2b6a1	Peru	―	―	―
JX669238	―	B2b6a1	Peru	―	―	―
KY680909	―	B2b6a1	Peru	―	Mestizo	―
KY680911	―	B2b6a1a	Ecuador	―	Native	―
KY680912	―	B2b6a1a	Ecuador	―	Native	―
KY680913	―	B2b6a1a	Ecuador	―	Native	―
KY680914	―	B2b6a1a	Ecuador	―	Native	―
KY680915	―	B2b6a1a	Ecuador	Chimborazo, Riobamba	Mestizo	―
KY680916	―	B2b6a1a	Ecuador	Chimborazo, Colta	Native Puruhà	―
KY680917	―	B2b6a1a	Ecuador	Cotopaxi, Salcedo	Mestizo	―
KY680918	―	B2b6a1a	Ecuador	Loja, Oñacapa	Native	―
KY680919	―	B2b6a1a	Ecuador	Loja, Gañil	Native	―
KY680920	―	B2b6a1a	Ecuador	―	Native	―
KY680921	―	B2b6a1a	Ecuador	Pichincha, Quito	Mestizo	―
KY680922	―	B2b6a1a	Ecuador	Loja	Mestizo	―
KY680932	―	B2b6b	Ecuador	Pichincha, Quito	Mestizo	―
KY680926	―	B2b6b1	Ecuador	Loja	Mestizo	―
KY680930	―	B2b6b1	Ecuador	―	Mestizo	―
KY680931	―	B2b6b1	Ecuador	Loja	Mestizo	―
KY680927	―	B2b6b1a	Ecuador	Loja	Mestizo	―
KY680928	―	B2b6b1a	Ecuador	Loja, Gonzanama	Native	―
KY680929	―	B2b6b1a	Ecuador	Loja	Mestizo	―
JX669305	―	B2b6b1a	Peru	―	―	―
KY680933	―	B2b7	Ecuador	Loja, Oñacapa	Native	―
KY680934	―	B2b7	Ecuador	―	Mestizo	―
KY680935	―	B2b7	Ecuador	―	Native	―
KY680936	―	B2b7	Ecuador	Loja, Oñacapa	Native	―
KY680937	―	B2b7	Ecuador	―	Native	―
KY680938	―	B2b7	Ecuador	Loja	Mestizo	―
JX669327	―	B2b8	Peru	―	―	―
KY680942	―	B2b8a	Ecuador	―	Native	―
KY680943	―	B2b8a	Ecuador	Loja, Oñacapa	Native	―
KY680944	―	B2b8a	Ecuador	Loja	Mestizo	―
JX669193	―	B2b9	Peru	―	―	―
JX669349	―	B2b9	Peru	―	―	―
JX669366	―	B2b9	Peru	―	―	―
JX669307	―	B2b9a	Peru	―	―	―
JX669358	―	B2b9a	Peru	―	―	―
JX669371	―	B2b9a	Peru	―	―	―
JX669388	―	B2b9a	Peru	―	―	―
KU523277	―	B2b9a	Peru	―	Ancient sample	744±170
KU523283	―	B2b9a	Peru	―	Ancient sample	1,639±275
JX669154	―	B2b9b	Peru	―	―	―
JX669160	―	B2b9b	Peru	―	―	―
KU523278	―	B2b9b	Peru	―	Ancient sample	744±170
KU523298	―	B2b9b	Peru	―	Ancient sample	779±235
KY680945	―	B2b9c	Ecuador	Los Rios, Babahoyo	Mestizo	―
JX669338	―	B2b9c	Peru	―	―	―
KU523281	―	B2b9c	Peru	―	Ancient sample	1,264±750
KU523296	―	B2b9c	Peru	―	Ancient sample	509±67
JQ702293	―	B2l	―	―	―	―
―	NA19785	B2l1	Mexico	―	―	―
KY680875	―	B2l1a	Ecuador	Loja, Gañil	Mestizo	―
KY680868	―	B2l1a1	Ecuador	Loja, Oñacapa	Native	―
KY680869	―	B2l1a1	Ecuador	―	Native	―
KY680870	―	B2l1a1	Ecuador	Loja, Oñacapa	Native	―
KY680871	―	B2l1a1	Ecuador	Loja, Oñacapa	Native	―
KY680872	―	B2l1a1	Ecuador	―	Native	―
KY680873	―	B2l1a1	Ecuador	Loja, Gañil	Native	―
KY680874	―	B2l1a1	Ecuador	Loja, Oñacapa	Native	―
KY680831	―	B2o1	Ecuador	Loja, Quilanga	Mestizo	―
KY680832	―	B2o1	Ecuador	Chimborazo, El Altar	Mestizo	―
KC503931	―	B2o1a	Bolivia	―	―	―
KC503932	―	B2o1a	Bolivia	―	―	―
KC503933	―	B2o1a	Bolivia	―	―	―
HQ012153	―	B2q	Mexico	―	―	―
HQ012176	―	B2q	Mexico	―	―	―
KM102005	―	B2q	USA	―	Hispanic	―
KY680856	―	B2q1	Ecuador	Pichincha, Zambiza	Mestizo	―
KY680857	―	B2q1	Ecuador	Loja, Catacocha	Mestizo	―
KY680858	―	B2q1	Ecuador	Loja	Mestizo	―
KY680851	―	B2q1a	Ecuador	―	Native	―
KY680852	―	B2q1a	Ecuador	Loja, Gañil	Native	―
KY680853	―	B2q1a	Ecuador	―	Native	―
KY680854	―	B2q1a	Ecuador	Loja	Mestizo	―
KY680855	―	B2q1a	Ecuador	―	Mestizo	―
KY680859	―	B2q1a	Ecuador	El Oro, Arenillas	Mestizo	―
KY680860	―	B2q1a	Ecuador	―	Mestizo	―
KY680866	―	B2q1a	Ecuador	Loja, Oñacapa	Native	―
JX669335	―	B2q1a	Peru	―	―	―
KY680861	―	B2q1a1	Ecuador	Loja, Oñacapa	Native	―
KY680862	―	B2q1a1	Ecuador	Loja, Oñacapa	Native	―
KY680863	―	B2q1a1	Ecuador	―	Native	―
KY680864	―	B2q1a1	Ecuador	Loja, Oñacapa	Native	―
KY680865	―	B2q1a1	Ecuador	Loja	Mestizo	―
KY680867	―	B2q1b	Ecuador	―	Mestizo	―
KU523279	―	B2q1b	Peru	―	Ancient sample	744±170
EU095207	―	B2y	Brazil?	―	Gaviao	―
JX669178	―	B2y	Peru	―	―	―
KY680883	―	B2y	Peru	Lima	―	―
―	NA19735	B2y	USA	―	Mexica American	―
JQ705259	―	B2y1	―	―	―	―
EU431084	―	B2y1	USA	―	―	―
―	HG02299	B2y3	Peru	Lima	―	―
JX669355	―	B2y3	Peru	―	―	―
―	HG01572	B2y2	Peru	Lima	―	―
―	HG01983	B2y2a	Peru	Lima	―	―
KP172328	―	B2y2a1a	Argentina	―	―	―
JX669226	―	B2y2a1a	Peru	―	―	―
KU523309	―	B2y2a1	Peru	Jauranga site	Ancient sample	1650± 50
KU523311	―	B2y2a1	Peru	Los Molinos site	Ancient sample	1900±100
EU597534	―	B2y2a2	―	―	―	―
JX669317	―	B2y2a2a	Peru	―	―	―
JX669342	―	B2y2a2a	Peru	―	―	―
JX669359	―	B2y2a2a	Peru	―	―	―
KY680846	―	B2z	Ecuador	―	Mestizo	―
KY680833	―	B2z1	Ecuador	―	Mestizo	―
KY680834	―	B2z1	Ecuador	Cotopaxi, Sigchos	Native Panzaleo (Quincha)	―
KY680835	―	B2z1a	Ecuador	Loja, Gañil	Native	―
KY680836	―	B2z1a	Ecuador	Loja, Oñacapa	Native	―
KY680837	―	B2z1a	Ecuador	Loja, Oñacapa	Native	―
KY680838	―	B2z1a	Ecuador	Loja, Gañil	Native	―
KY680839	―	B2z1a	Ecuador	Loja, Oñacapa	Native	―
KY680840	―	B2z1a	Ecuador	Loja, Oñacapa	Native	―
KY680841	―	B2z1a	Ecuador	―	Native	―
KY680842	―	B2z1a	Ecuador	Loja	Mestizo	―
KY680843	―	B2z1a	Ecuador	Loja, Gañil	Native	―
KY680844	―	B2z1a	Ecuador	―	Native	―
KY680845	―	B2z1a	Ecuador	Loja, Oñacapa	Native	―
KU523330	―	C1b	Peru	―	Ancient sample	779±235
JX669186	―	C1b16	Peru	―	―	―
JX669188	―	C1b16	Peru	―	―	―
JX669203	―	C1b16	Peru	―	―	―
JX669254	―	C1b16	Peru	―	―	―
JX669309	―	C1b16	Peru	―	―	―
JX669250	―	C1b19	Peru	―	―	―
KU523313	―	C1b19	Peru	―	Ancient sample	684±22
KU523314	―	C1b19	Peru	―	Ancient sample	744±170
KU523315	―	C1b19	Peru	―	Ancient sample	744±170
KU523317	―	C1b19	Peru	―	Ancient sample	1,078±96
KU523318	―	C1b19	Peru	―	Ancient sample	1,264±750
KU523319	―	C1b19	Peru	―	Ancient sample	1,264±750
KU523320	―	C1b19	Peru	―	Ancient sample	1,264±750
KU523324	―	C1b19	Peru	―	Ancient sample	1,362±54
KU523325	―	C1b19	Peru	―	Ancient sample	1,639±275
―	HG02292	C1b19	Peru	―	―	―
JX669365	―	C1b21	Peru	―	―	―
JX669288	―	C1b21a	Peru	―	―	―
JX669377	―	C1b21a	Peru	―	―	―
KU523316	―	C1b21a	Peru	―	Ancient sample	744±170
KU523328	―	C1b21a	Peru	―	Ancient sample	509±67
KY680952	―	C1b23	Ecuador	Loja	Native Saraguro	―
KY680953	―	C1b23	Ecuador	Loja, Tuncarta	Native Saraguro	―
KY680954	―	C1b23	Ecuador	Loja, Oñacapa	Native	―
KY680955	―	C1b23	Ecuador	―	Native	―
KY680956	―	C1b23	Ecuador	Loja, Oñacapa	Native	―
KY680957	―	C1b23	Ecuador	Loja, Gañil	Native	―
KY680958	―	C1b23	Ecuador	Loja, Oñacapa	Native	―
KY680959	―	C1b23	Ecuador	Loja, Oñacapa	Native	―
KY680960	―	C1b23	Ecuador	Loja, Oñacapa	Native	―
KY680961	―	C1b23	Ecuador	Loja, Gañil	Native	―
KY680962	―	C1b23	Ecuador	Loja, Oñacapa	Native	―
KY680963	―	C1b23	Ecuador	―	Mestizo	―
KY680964	―	C1b23	Ecuador	Loja, Oñacapa	Native	―
KY680965	―	C1b23	Ecuador	―	Native	―
KY680966	―	C1b23	Ecuador	Loja, Catacocha	Mestizo	―
KY680967	―	C1b23	Ecuador	―	Mestizo	―
JX669214	―	C1b24	Peru	―	―	―
JX669246	―	C1b24	Peru	―	―	―
JX669294	―	C1b24	Peru	―	―	―
JX669306	―	C1b24	Peru	―	―	―
JX669192	―	C1b25	Peru	―	―	―
JX669367	―	C1b25	Peru	―	―	―
JX669380	―	C1b25	Peru	―	―	―
―	HG01932	C1b26	Peru	―	―	―
KY680991	―	C1b26a	Ecuador	Tungurahua	Mestizo	―
JX669280	―	C1b26a1	Peru	―	―	―
JX669386	―	C1b26a1	Peru	―	―	―
―	HG01982	C1b26a1	Peru	―	―	―
JX669313	―	C1b27	Peru	―	―	―
JX669333	―	C1b27	Peru	―	―	―
KU523323	―	C1b27	Peru	―	Ancient sample	751±50
KY680988	―	C1b28	Ecuador	Chimborazo, Alauisi	Mestizo	―
KY680989	―	C1b28	Ecuador	―	Native	―
KY680990	―	C1b28	Ecuador	Loja	Mestizo	―
KP851974	―	C1b29	Ecuador	Quito	―	―
KY680972	―	C1b29	Ecuador	Bolivar	Mestizo	―
KY680973	―	C1b29	Ecuador	Cotopaxi, Manà	Mestizo	―
KY680974	―	C1b29	Ecuador	―	Native	―
KY680975	―	C1b29	Ecuador	Loja	Mestizo	―
HM107352	―	C1d1e	Peru	―	―	―
HM107353	―	C1d1e	Peru	―	―	―
HM107354	―	C1d1e	Peru	―	―	―
HM107359	―	C1d1e	Peru	―	―	―
HM107343	―	C1d1f	Ecuador	Imbabura	―	―
KY680981	―	C1d1f	Ecuador	Pichincha, Ruminahui	Mestizo	―
KY680982	―	C1d1f	Ecuador	Pichincha, Quito	Mestizo	―
KY680983	―	C1d1f	Ecuador	Cotopaxi	Mestizo	―
KC257286	―	D1f	―	―	―	―
EU095536	―	D1f	Colombia	―	Coreguaje	―
KY680995	―	D1f	Ecuador	Loja	Mestizo	―
KY680996	―	D1f	Ecuador	Pichincha, Quito	Mestizo	―
KY680997	―	D1f	Ecuador	Pichincha, Quito	Mestizo	―
KY680998	―	D1f	Ecuador	Loja	Mestizo	―
KY680999	―	D1f	Ecuador	Cotopaxi, Cusubamba	Native Panzaleo (Quincha)	―
KY681000	―	D1f	Ecuador	―	Mestizo	―
KY681001	―	D1f	Ecuador	Loja, Calvas	Mestizo	―
KY681002	―	D1f	Ecuador	―	Mestizo	―
KY681003	―	D1f	Ecuador	―	Mestizo	―
JX669231	―	D1f	Peru	―	―	―
JX669239	―	D1f	Peru	―	―	―
JX669276	―	D1f	Peru	―	―	―
EU431089	―	D1f	USA	―	―	―
EU095235	―	D1f1	Brazil	―	Waiwai	―
EU095238	―	D1f1	Brazil	―	Katuena	―
EU095240	―	D1f1	Brazil	―	Tiryo	―
EU095241	―	D1f1	Brazil	―	Tiryo	―
KF451520	―	D1f1	Brazil	―	―	―
KJ446600	―	D1f1	Brazil	―	Karitiana	―
KY681012	―	D1f1	Venezuela	―	―	―
KY681014	―	D1f1	Venezuela	―	―	―
JQ702137	―	D1f2	―	―	―	―
―	HG01441	D1f2	Colombia	―	―	―
JQ701868	―	D1f3	―	―	―	―
HQ012257	―	D1f3	Mexico	―	―	―
HQ012252	―	D1k	Mexico	―	―	―
―	NA19755	D1k	Mexico	―	―	―
DQ282483	―	D1k	USA	―	Hispanic	―
JX669348	―	D1k1	Peru	―	―	―
KM102096	―	D1k1	USA	―	Hispanic	―
JX669228	―	D1k1a	Peru	―	―	―
JX669331	―	D1k1a	Peru	―	―	―
JX669344	―	D1k1a	Peru	―	―	―
JX669397	―	D1k1a	Peru	―	―	―
JX669136	―	D1o	Peru	―	―	―
JX669167	―	D1o	Peru	―	―	―
JX669176	―	D1o	Peru	―	―	―
JX669232	―	D1o	Peru	―	―	―
KU523348	―	D1o	Peru	―	Ancient sample	779±235
JX669138	―	D1p	Peru	―	―	―
JX669210	―	D1p	Peru	―	―	―
JX669227	―	D1p	Peru	―	―	―
JX669145	―	D1q	Peru	―	―	―
JX669142	―	D1q1	Peru	―	―	―
JX669174	―	D1q1	Peru	―	―	―
JX669281	―	D1q1	Peru	―	―	―
KY681008	―	D1r	Peru	―	Mestizo	―
JX669143	―	D1r1	Peru	―	―	―
JX669164	―	D1r1	Peru	―	―	―
JX669166	―	D1r1	Peru	―	―	―
JX669217	―	D1r1	Peru	―	―	―
JX669293	―	D1r1	Peru	―	―	―
JX669285	―	D1s	Peru	―	―	―
JX669204	―	D1s1	Peru	―	―	―
JX669219	―	D1s1	Peru	―	―	―
JX669229	―	D1s1	Peru	―	―	―
JX669234	―	D1t	Peru	―	―	―
JX669241	―	D1t	Peru	―	―	―
JX669277	―	D1t	Peru	―	―	―
KU523350	―	D1u	Peru	―	Ancient sample	4,000
JX669266	―	D1u1	Peru	―	―	―
JX669361	―	D1u1	Peru	―	―	―
JX669368	―	D1u1	Peru	―	―	―
JX669378	―	D1u1	Peru	―	―	―
KY681009	―	D1u1	Peru	―	Mestizo	―
FJ168751	―	D4h3a11	Peru	―	―	―
JX669163	―	D4h3a11	Peru	―	―	―
JX669257	―	D4h3a11	Peru	―	―	―
KY681016	―	B2b3a1a	Venezuela	―	―	―
