# Supplementary material for: The peopling of South America and the trans-Andean gene flow of the first settlers
Source: HighWire-hosted journal article supplement (doi:10.1101/gr.234674.118), 2018-05-07
Supplement: Supplemental_Table_S10.xlsx [file Supplemental_Table_S10.xlsx]

## Sheet: Supplemental Table S11
Supplemental Table S10. List of articles containing mtDNA sequence data used in the present paper (e.g. interpolated frequency maps of Figures 1 to 4).
Region	Country	n	Reference
South America	Argentina	60	Alvarez-Iglesias V, Jaime JC, Carracedo A, and Salas A. 2007. Coding region mitochondrial DNA SNPs: targeting East Asian and Native American haplogroups. Forensic science international Genetics 1(1):44-55.
South America	Brazil	247	Alves-Silva J, da Silva Santos M, Guimaraes PE, Ferreira AC, Bandelt HJ, Pena SD, and Prado VF. 2000. The ancestry of Brazilian mtDNA lineages. American journal of human genetics 67(2):444-461.
South America	Ecuador	107	Baeta M, Nunez C, Sosa C, Bolea M, Casalod Y, Gonzalez-Andrade F, Roewer L, and Martinez-Jarreta B. 2012. Mitochondrial diversity in Amerindian Kichwa and Mestizo populations from Ecuador. IInternational Journal of Legal Medicine 126(2):299-302.
South America	Ecuador	111	Baeta M, Núñez C, González-Andrade F, Sosa C, Casalod Y, Bolea M, Zweynert S, Vacas Cruz OW, González-Solorzano J, Geppert M et al. . 2009. Mitochondrial analysis revealed high homogeneity in the Waorani population-The last nomadic group of hunter-gatherers from Ecuador. Forensic Science International: Genetics Supplement Series 2(1):313-314.
South America	Peru	64	Barbieri C, Heggarty P, Castri L, Luiselli D, and Pettener D. 2011. Mitochondrial DNA variability in the Titicaca basin: Matches and mismatches with linguistics and ethnohistory. American journal of human biology : the official journal of the Human Biology Council 23(1):89-99.
South America	Peru	214	Barbieri C, Heggarty P, Yang Yao D, Ferri G, De Fanti S, Sarno S, Ciani G, Boattini A, Luiselli D, and Pettener D. 2014. Between Andes and Amazon: the genetic profile of the Arawak-speaking Yanesha. American Journal of Physical Anthropology 155(4):600-609.
South America	Brazil	167	Barbosa AB, da Silva LA, Azevedo DA, Balbino VQ, and Mauricio-da-Silva L. 2008. Mitochondrial DNA control region polymorphism in the population of Alagoas state, north-eastern Brazil. Journal of forensic sciences 53(1):142-146.
South America	Bolivia	67	Batai K, and Williams SR. 2014. Mitochondrial variation among the Aymara and the signatures of population expansion in the central Andes. American journal of human biology : the official journal of the Human Biology Council 26(3):321-330.
Caribbean	St. Vincent/Trinidad and Tobago	88	Benn Torres J, Vilar MG, Torres GA, Gaieski JB, Bharath Hernandez R, Browne ZE, Stevenson M, Walters W, Schurr TG, and Genographic C. 2015. Genetic Diversity in the Lesser Antilles and Its Implications for the Settlement of the Caribbean Basin. PLoS One 10(10):e0139192.
South America	Brazil	190	Bernardo S, Hermida R, Desiderio M, Silva DA, and de Carvalho EF. 2014. MtDNA ancestry of Rio de Janeiro population, Brazil. Molecular biology reports 41(4):1945-1950.
South America	Bolivia	54	Bert F, Corella A, Gene M, Perez-Perez A, and Turbon D. 2004. Mitochondrial DNA diversity in the Llanos de Moxos: Moxo, Movima and Yuracare Amerindian populations from Bolivia lowlands. Annals of human biology 31(1):9-28.
South America	Argentina	338	Bobillo MC, Zimmermann B, Sala A, Huber G, Rock A, Bandelt HJ, Corach D, and Parson W. 2010. Amerindian mitochondrial DNA haplogroups predominate in the population of Argentina: towards a first nationwide forensic mitochondrial DNA sequence database. IInternational Journal of Legal Medicine 124(4):263-268.
South America	Uruguay	24	Bonilla C, Bertoni B, Gonzalez S, Cardoso H, Brum-Zorrilla N, and Sans M. 2004. Substantial Native American female contribution to the population of Tacuarembo, Uruguay, reveals past episodes of sex-biased gene flow. American journal of human biology : the official journal of the Human Biology Council 16(3):289-297.
South America	Peru	611	Cabana GS, Lewis CM, Jr., Tito RY, Covey RA, Caceres AM, Cruz AF, Durand D, Housman G, Hulsey BI, Iannacone GC et al. . 2014. Population genetic structure of traditional populations in the Peruvian Central Andes and implications for South American population history. Human biology 86(3):147-165.
South America	Argentina	209	Cabana GS, Merriwether DA, Hunley K, and Demarchi DA. 2006. Is the genetic structure of Gran Chaco populations unique? Interregional perspectives on native South American mitochondrial DNA variation. American Journal of Physical Anthropology 131(1):108-119.
South America	Colombia	308	Cano D, Gomez CF, Ospina N, Cajigas JA, Groot H, Andrade RE, and Torres MM. 2014. Mitochondrial DNA haplogroups and susceptibility to prostate cancer in a colombian population. ISRN oncology 2014:530675.
South America	Brazil	492	Cardena MM, Ribeiro-Dos-Santos A, Santos S, Mansur AJ, Pereira AC, and Fridman C. 2013. Assessment of the relationship between self-declared ethnicity, mitochondrial haplogroups and genomic ancestry in Brazilian individuals. PLoS One 8(4):e62005.
South America	Ecuador	35	Cardoso S, Alfonso-Sánchez MA, González-Andrade F, Valverde L, Odriozola A, Pérez-Miranda AM, Peña JA, Martínez-Jarreta B, de Pancorbo MM. 2008. Mitochondrial DNA in Huaorani (Ecuadorian amerindians): a new variant in haplogroup A2. Foren Sci Int Gene Supp Ser 1:269-270
South America	Ecuador	36	Cardoso S, Alfonso-Sanchez MA, Valverde L, Sanchez D, Zarrabeitia MT, Odriozola A, Martinez-Jarreta B, and de Pancorbo MM. 2012. Genetic uniqueness of the Waorani tribe from the Ecuadorian Amazon. Heredity 108(6):609-615.
South America	Argentina	180	Cardoso S, Palencia-Madrid L, Valverde L, Alfonso-Sanchez MA, Gomez-Perez L, Alfaro E, Bravi CM, Dipierri JE, Pena JA, and de Pancorbo MM. 2013. Mitochondrial DNA control region data reveal high prevalence of Native American lineages in Jujuy province, NW Argentina. Forensic science international Genetics 7(3):e52-55.
Meso America	Costa Rica	44	Castri L, Otarola F, Blell M, Ruiz E, Barrantes R, Luiselli D, Pettener D, and Madrigal L. 2007. Indentured migration and differential gender gene flow: the origin and evolution of the East-Indian community of Limon, Costa Rica. American Journal of Physical Anthropology 134(2):175-189.
South America	Venezuela	101	Castro de Guerra D, Figuera Perez C, Bravi CM, Saunier J, Scheible M, Irwin J, Coble MD, and Rodriguez-Larralde A. 2012. Sequence variation of mitochondrial DNA control region in North Central Venezuela. Forensic science international Genetics 6(5):e131-133.
South America	Argentina	384	Catelli ML, Alvarez-Iglesias V, Gomez-Carballa A, Mosquera-Miguel A, Romanini C, Borosky A, Amigo J, Carracedo A, Vullo C, and Salas A. 2011. The impact of modern migrations on present-day multi-ethnic Argentina as recorded on the mitochondrial DNA genome. BMC genetics 12:77.
South America	Bolivia	46	Corella A, Bert F, Perez-Perez A, Gene M, and Turbon D. 2007. Mitochondrial DNA diversity of the Amerindian populations living in the Andean Piedmont of Bolivia: Chimane, Moseten, Aymara and Quechua. Annals of human biology 34(1):34-55.
South America	Chile/Argentina	287	de Saint Pierre M, Bravi CM, Motti JM, Fuku N, Tanaka M, Llop E, Bonatto SL, and Moraga M. 2012. An alternative model for the early peopling of southern South America revealed by analyses of three mitochondrial DNA haplogroups. PLoS One 7(9):e43486.
South America	Bolivia/Paraguay	91	Dornelles CL, Battilana J, Fagundes NJ, Freitas LB, Bonatto SL, and Salzano FM. 2004. Mitochondrial DNA and Alu insertions in a genetically peculiar population: the Ayoreo Indians of Bolivia and Paraguay. American journal of human biology : the official journal of the Human Biology Council 16(4):479-488.
South America	Brazil	50	Easton RD, Merriwether DA, Crews DE, and Ferrell RE. 1996. mtDNA variation in the Yanomami: evidence for additional New World founding lineages. American Journal of Human Genetics 59(1):213-225.
South America	Brazil	60	Feio-Dos-Santos AC, Carvalho BM, Batista dos Santos SE, and Ribeiro-dos-Santos AK. 2006. Nucleotide variability of HV-I in admixed population of the Brazilian Amazon Region. Forensic science international 164(2-3):276-277.
South America	Brazil	290	Fridman C, Gonzalez RS, Pereira AC, and Cardena MM. 2014. Haplotype diversity in mitochondrial DNA hypervariable region in a population of southeastern Brazil. IInternational Journal of Legal Medicine 128(4):589-593.
South America	Peru	105	Fuselli S, Tarazona-Santos E, Dupanloup I, Soto A, Luiselli D, and Pettener D. 2003. Mitochondrial DNA diversity in South America and the genetic history of Andean highlanders. Molecular biology and evolution 20(10):1682-1691.
South America	Bolivia	189	Gaya-Vidal M, Moral P, Saenz-Ruales N, Gerbault P, Tonasso L, Villena M, Vasquez R, Bravi CM, and Dugoujon JM. 2011. mtDNA and Y-chromosome diversity in Aymaras and Quechuas from Bolivia: different stories and special genetic traits of the Andean Altiplano populations. American Journal of Physical Anthropology 145(2):215-230.
South America	Venezuela	250	Gomez-Carballa A, Ignacio-Veiga A, Alvarez-Iglesias V, Pastoriza-Mourelle A, Ruiz Y, Pineda L, Carracedo A, and Salas A. 2012. A melting pot of multicontinental mtDNA lineages in admixed Venezuelans. American Journal of Physical Anthropology 147(1):78-87.
South America	Chile	995	Gomez-Carballa A, Moreno F, Alvarez-Iglesias V, Martinon-Torres F, Garcia-Magarinos M, Pantoja-Astudillo JA, Aguirre-Morales E, Bustos P, and Salas A. 2016. Revealing latitudinal patterns of mitochondrial DNA diversity in Chileans. Forensic science international Genetics 20:81-88.
Meso America	Mexico	520	Gonzalez-Martin A, Gorostiza A, Regalado-Liu L, Arroyo-Pena S, Tirado S, Nuno-Arana I, Rubi-Castellanos R, Sandoval K, Coble MD, and Rangel-Villalobos H. 2015. Demographic History of Indigenous Populations in Mesoamerica Based on mtDNA Sequence Data. PLoS One 10(8):e0131791.
Meso America	Mexico	270	Guardado-Estrada M, Juarez-Torres E, Medina-Martinez I, Wegier A, Macias A, Gomez G, Cruz-Talonia F, Roman-Bassaure E, Pinero D, Kofman-Alfaro S et al. . 2009. A great diversity of Amerindian mitochondrial DNA ancestry is present in the Mexican mestizo population. Journal of Human Genetics 54(12):695-705.
Meso America	Brazil	172	Guerreiro-Junior V, Bisso-Machado R, Marrero A, Hunemeier T, Salzano FM, and Bortolini MC. 2009. Genetic signatures of parental contribution in black and white populations in Brazil. Genet Mol Biol 32(1):1-11.
Meso America/North America	Mexico/USA	689	Kemp BM, Gonzalez-Oliver A, Malhi RS, Monroe C, Schroeder KB, McDonough J, Rhett G, Resendez A, Penaloza-Espinosa RI, Buentello-Malo L et al. . 2010. Evaluating the Farming/Language Dispersal Hypothesis with genetic variation exhibited by populations in the Southwest and Mesoamerica. Proceedings of the National Academy of Sciences of the United States of America 107(15):6759-6764.
North America	USA	283	King JL, LaRue BL, Novroski NM, Stoljarova M, Seo SB, Zeng X, Warshauer DH, Davis CP, Parson W, Sajantila A et al. . 2014. High-quality and high-throughput massively parallel sequencing of the human mitochondrial genome using the Illumina MiSeq. Forensic science international Genetics 12:128-135.
North America	USA	79	Kittles RA, Bergen AW, Urbanek M, Virkkunen M, Linnoila M, Goldman D, and Long JC. 1999. Autosomal, mitochondrial, and Y chromosome DNA variation in Finland: evidence for a male-specific bottleneck. American Journal of Physical Anthropology 108(4):381-399.
Meso America	Panama	71	Kolman CJ, and Bermingham E. 1997. Mitochondrial and nuclear DNA diversity in the Choco and Chibcha Amerinds of Panama. Genetics 147(3):1289-1302.
Meso America	Panama	46	Kolman CJ, Bermingham E, Cooke R, Ward RH, Arias TD, and Guionneau-Sinclair F. 1995. Reduced mtDNA diversity in the Ngobe Amerinds of Panama. Genetics 140(1):275-283.
South America	Venezuela	100	Lander N, Rojas MG, Chiurillo MA, and Ramirez JL. 2008. Haplotype diversity in human mitochondrial DNA hypervariable regions I-III in the city of Caracas (Venezuela). Forensic science international Genetics 2(4):e61-64.
South America	Peru	96	Lewis CM, Jr., Lizarraga B, Tito RY, Lopez PW, Iannacone GC, Medina A, Martinez R, Polo SI, De La Cruz AF, Caceres AM et al. . 2007. Mitochondrial DNA and the peopling of South America. Human biology 79(2):159-178.
South America	Perú	33	Lewis CM, Jr., Tito RY, Lizarraga B, and Stone AC. 2005. Land, language, and loci: mtDNA in Native Americans and the genetic history of Peru. American Journal of Physical Anthropology 127(3):351-360.
Caribbean	Jamaica	50	Madrilejo N, Lombard H, and Torres JB. 2015. Origins of marronage: Mitochondrial lineages of Jamaica's Accompong Town Maroons. American journal of human biology : the official journal of the Human Biology Council 27(3):432-437.
North America	USA	53	Malhi RS, Mortensen HM, Eshleman JA, Kemp BM, Lorenz JG, Kaestle FA, Johnson JR, Gorodezky C, and Smith DG. 2003. Native American mtDNA prehistory in the American Southwest. American Journal of Physical Anthropology 120(2):108-124.
North America	USA/Canada	110	Malhi RS, Schultz BA, and Smith DG. 2001. Distribution of mitochondrial DNA lineages among Native American tribes of Northeastern North America. Human biology 73(1):17-55.
South America	Brazil	119	Marrero AR, Das Neves Leite FP, De Almeida Carvalho B, Peres LM, Kommers TC, Da Cruz IM, Salzano FM, Ruiz-Linares A, Da Silva Junior WA, and Bortolini MC. 2005. Heterogeneity of the genome ancestry of individuals classified as White in the state of Rio Grande do Sul, Brazil. American journal of human biology : the official journal of the Human Biology Council 17(4):496-506.
South America	Brazil	278	Marrero AR, Silva-Junior WA, Bravi CM, Hutz MH, Petzl-Erler ML, Ruiz-Linares A, Salzano FM, and Bortolini MC. 2007. Demographic and evolutionary trajectories of the Guarani and Kaingang natives of Brazil. American Journal of Physical Anthropology 132(2):301-310.
South America	French Guiana	349	Mazieres S, Guitard E, Crubezy E, Dugoujon JM, Bortolini MC, Bonatto SL, Hutz MH, Bois E, Tiouka F, Larrouy G et al. . 2008. Uniparental (mtDNA, Y-chromosome) polymorphisms in French Guiana and two related populations--implications for the region's colonization. Ann Hum Genet 72(Pt 1):145-156.
South America	Colombia	110	Melton PE, Briceno I, Gomez A, Devor EJ, Bernal JE, and Crawford MH. 2007. Biological relationship between Central and South American Chibchan speaking populations: evidence from mtDNA. American Journal of Physical Anthropology 133(1):753-770.
Caribbean	Cuba	245	Mendizabal I, Sandoval K, Berniell-Lee G, Calafell F, Salas A, Martinez-Fuentes A, and Comas D. 2008. Genetic origin, admixture, and asymmetry in maternal and paternal human lineages in Cuba. BMC evolutionary biology 8:213.
South America	Venezuela/Brazil	129	Merriwether, D. A., Kemp, B. M., Crews, D. E., & Neel, J. V. 2000. Gene flow and genetic variation in the Yanomama as revealed by mitochondrial DNA. America past, America present: Genes and languages in the Americas and beyond. Cambridge: McDonald Institute for Archaeological Research, 89-124.
Meso America	Belize	30	Monsalve MV, and Hagelberg E. 1997. Mitochondrial DNA polymorphisms in Carib people of Belize. Proceedings Biological sciences 264(1385):1217-1224.
South America	Chile	73	Moraga ML, Rocco P, Miquel JF, Nervi F, Llop E, Chakraborty R, Rothhammer F, and Carvallo P. 2000. Mitochondrial DNA polymorphisms in Chilean aboriginal populations: implications for the peopling of the southern cone of the continent. American Journal of Physical Anthropology 113(1):19-29.
Meso America	Nicaragua	163	Nunez C, Baeta M, Sosa C, Casalod Y, Ge J, Budowle B, and Martinez-Jarreta B. 2010. Reconstructing the population history of Nicaragua by means of mtDNA, Y-chromosome STRs, and autosomal STR markers. American Journal of Physical Anthropology 143(4):591-600.
South America	Uruguay	120	Pagano S, Sans M, Pimenoff V, Cantera AM, Alvarez JC, Lorente JA, Peco JM, Mones P, and Sajantila A. 2005. Assessment of HV1 and HV2 mtDNA variation for forensic purposes in an Uruguayan population sample. J Forensic Sci 50(5):1239-1242.
South America	Brazil	80	Palencia L, Valverde L, Alvarez A, Caine LM, Cardoso S, Alfonso-Sanchez MA, Pinheiro MF, and de Pancorbo MM. 2010. Mitochondrial DNA diversity in a population from Santa Catarina (Brazil): predominance of the European input. IInternational Journal of Legal Medicine 124(4):331-336.
South America	Argentina	85	Pauro M, Garcia A, Nores R, and Demarchi DA. 2013. Analysis of uniparental lineages in two villages of Santiago Del Estero, Argentina, seat of Pueblos de Indios in colonial times. Human biology 85(5):699-720.
Meso America	Panama	1565	Perego UA, Lancioni H, Tribaldos M, Angerhofer N, Ekins JE, Olivieri A, Woodward SR, Pascale JM, Cooke R, Motta J et al. . 2012. Decrypting the mitochondrial gene pool of modern Panamanians. PLoS One 7(6):e38337.
South America	Brazil	292	Prieto L, Zimmermann B, Goios A, Rodriguez-Monge A, Paneto GG, Alves C, Alonso A, Fridman C, Cardoso S, Lima G et al. . 2011. The GHEP-EMPOP collaboration on mtDNA population data--A new resource for forensic casework. Forensic science international Genetics 5(2):146-151.
North America	USA	151	Raff JA, Rzhetskaya M, Tackney J, and Hayes MG. 2015. Mitochondrial diversity of Inupiat people from the Alaskan North Slope provides evidence for the origins of the Paleo- and Neo-Eskimo peoples. American Journal of Physical Anthropology 157(4):603-614.
South America	-	130	Ramallo V, Bisso-Machado R, Bravi C, Coble MD, Salzano FM, Hunemeier T, and Bortolini MC. 2013. Demographic expansions in South America: enlightening a complex scenario with genetic and linguistic data. American Journal of Physical Anthropology 150(3):453-463.
South America	Ecuador	30	Rickards O, Martinez-Labarga C, Lum JK, De Stefano GF, and Cann RL. 1999. mtDNA history of the Cayapa Amerinds of Ecuador: detection of additional founding lineages for the Native American populations. American Journal of Human Genetics 65(2):519-530.
South America	Argentina	434	Sala A, and Corach D. 2014. Analysis of admixture and genetic structure of two Native American groups of Southern Argentinean Patagonia. Molecular biology reports 41(3):1533-1543.
South America	Argentina	121	Sala A, Arguelles CF, Marino ME, Bobillo C, Fenocchio A, and Corach D. 2010. Genetic analysis of six communities of Mbya-Guarani inhabiting northeastern Argentina by means of nuclear and mitochondrial polymorphic markers. Human biology 82(4):433-456.
South America	Colombia	185	Salas A, Acosta A, Alvarez-Iglesias V, Cerezo M, Phillips C, Lareu MV, and Carracedo A. 2008a. The mtDNA ancestry of admixed Colombian populations. American journal of human biology : the official journal of the Human Biology Council 20(5):584-591.
South America	Argentina	102	Salas A, Jaime JC, Alvarez-Iglesias V, and Carracedo A. 2008b. Gender bias in the multiethnic genetic composition of central Argentina. Journal of Human Genetics 53(7):662-674.
Meso America	El Salvador	90	Salas A, Lovo-Gomez J, Alvarez-Iglesias V, Cerezo M, Lareu MV, Macaulay V, Richards MB, and Carracedo A. 2009. Mitochondrial echoes of first settlement and genetic continuity in El Salvador. PLoS One 4(9):e6882.
South America	Brazil	97	Sanches NM, Paneto GG, Figueiredo RF, de Mello AO, and Cicarelli RM. 2014. Mitochondrial DNA control region diversity in a population from Espirito Santo state, Brazil. Molecular biology reports 41(10):6645-6648.
South America	Peru	168	Sandoval JR, Lacerda DR, Acosta O, Jota MS, Robles-Ruiz P, Salazar-Granara A, Vieira PP, Paz YMC, Fujita R, Santos FR et al. . 2016. The Genetic History of Peruvian Quechua-Lamistas and Chankas: Uniparental DNA Patterns among Autochthonous Amazonian and Andean Populations. Ann Hum Genet 80(2):88-101.
South America	Peru/Bolivia	388	Sandoval JR, Lacerda DR, Jota MS, Salazar-Granara A, Vieira PP, Acosta O, Cuellar C, Revollo S, Fujita R, Santos FR et al. . 2013. The genetic history of indigenous populations of the Peruvian and Bolivian Altiplano: the legacy of the Uros. PLoS One 8(9):e73006.
Meso America	Mexico	477	Sandoval K, Buentello-Malo L, Penaloza-Espinosa R, Avelino H, Salas A, Calafell F, and Comas D. 2009. Linguistic and maternal genetic diversity are not correlated in Native Mexicans. Human genetics 126(4):521-531.
South America	Uruguay	43	Sans M, Merriwether DA, Hidalgo PC, Bentancor N, Weimer TA, Franco MH, Alvarez I, Kemp BM, and Salzano FM. 2006. Population structure and admixture in Cerro Largo, Uruguay, based on blood markers and mitochondrial DNA polymorphisms. American journal of human biology : the official journal of the Human Biology Council 18(4):513-524.
South America	Uruguay	57	Sans M, Mones P, Figueiro G, Barreto I, Motti JM, Coble MD, Bravi CM, and Hidalgo PC. 2015. The mitochondrial DNA history of a former native American village in northern Uruguay. American journal of human biology : the official journal of the Human Biology Council 27(3):407-416.
South America	Brazil	92	Santos SE, Ribeiro-Dos-Santos AK, Meyer D, and Zago MA. 1996. Multiple founder haplotypes of mitochondrial DNA in Amerindians revealed by RFLP and sequencing. Ann Hum Genet 60(Pt 4):305-319.
North America	USA	128	Saunier JL, Irwin JA, Just RS, O'Callaghan J, and Parsons TJ. 2008. Mitochondrial control region sequences from a U.S. "Hispanic" population sample. Forensic science international Genetics 2(2):e19-23.
South America	Paraguay	63	Schmitt R, Bonatto SL, Freitas LB, Muschner VC, Hill K, Hurtado AM, and Salzano FM. 2004. Extremely limited mitochondrial DNA variability among the Ache Natives of Paraguay. Annals of human biology 31(1):87-94.
South America	Argentina	552	Sevini F, Yao DY, Lomartire L, Barbieri A, Vianello D, Ferri G, Moretti E, Dasso MC, Garagnani P, Pettener D et al. . 2013. Analysis of population substructure in two sympatric populations of Gran Chaco, Argentina. PLoS One 8(5):e64054.
Meso America	Guatemala	110	Sochtig J, Alvarez-Iglesias V, Mosquera-Miguel A, Gelabert-Besada M, Gomez-Carballa A, and Salas A. 2015. Genomic insights on the ethno-history of the Maya and the 'Ladinos' from Guatemala. BMC genomics 16:131.
South America	Bolivia	720	Taboada-Echalar P, Alvarez-Iglesias V, Heinz T, Vidal-Bralo L, Gomez-Carballa A, Catelli L, Pardo-Seco J, Pastoriza A, Carracedo A, Torres-Balanza A et al. . 2013. The genetic legacy of the pre-colonial period in contemporary Bolivians. PLoS One 8(3):e58980.
South America	Colombia	64	Torres MM, Bravi CM, Bortolini MC, Duque C, Callegari-Jacques S, Ortiz D, Bedoya G, Groot de Restrepo H, and Ruiz-Linares A. 2006. A revertant of the major founder Native American haplogroup C common in populations from northern South America. American journal of human biology : the official journal of the Human Biology Council 18(1):59-65.
North-Meso-South America	-	38	Torroni A, Schurr TG, Cabell MF, Brown MD, Neel JV, Larsen M, Smith DG, Vullo CM, and Wallace DC. 1993. Asian affinities and continental radiation of the four founding Native American mtDNAs. American Journal of Human Genetics 53(3):563-590.
South America	Brazil	103	Varano S, Scorrano G, Martinez-Labarga C, Finocchio A, Rapone C, Berti A, and Rickards O. 2016. Exploring the mitochondrial DNA variability of the Amazonian Yanomami. American journal of human biology : the official journal of the Human Biology Council 28(6):846-856.
Caribbean	Puerto Rico	326	Vilar MG, Melendez C, Sanders AB, Walia A, Gaieski JB, Owings AC, Schurr TG, and Genographic C. 2014. Genetic diversity in Puerto Rico and its implications for the peopling of the Island and the West Indies. American Journal of Physical Anthropology 155(3):352-368.
South America	Venezuela	59	Vona G, Falchi A, Moral P, Calo CM, and Varesi L. 2005. Mitochondrial sequence variation in the Guahibo Amerindian population from Venezuela. American Journal of Physical Anthropology 127(3):361-369.
South America	Brazil	59	Ward RH, Salzano FM, Bonatto SL, Hutz MH, Coimbra CEA, Jr., and Santos RV. 1996. Mitochondrial DNA polymorphism in three Brazilian Indian tribes. American journal of human biology : the official journal of the Human Biology Council 8(3):317-323.
South America	Colombia	96	Xavier C, Builes JJ, Gomes V, Ospino JM, Aquino J, Parson W, Amorim A, Gusmao L, and Goios A. 2015. Admixture and genetic diversity distribution patterns of non-recombining lineages of Native American ancestry in Colombian populations. PLoS One 10(3):e0120155.
