# Supplementary material for: The peopling of South America and the trans-Andean gene flow of the first settlers
Source: HighWire-hosted journal article supplement (doi:10.1101/gr.234674.118), 2018-05-07
Supplement: Supplemental_Table_S11.xlsx [file Supplemental_Table_S11.xlsx]

## Sheet: Supplemental Table S11
Supplemental Table S11. List of B2b mitogenomes assessed in this study (others than the B2b3, B2b11 and B2b14 mitogenomes shown in Figure 4A).
GenBank ID	1000Genomes ID	Haplogroup	Country	Region	Ethnicity	Reference	Date calibration (ya)
KP172324	―	B2b	Argentina	Gran Chaco	―	Sevini et al. 2014, Unpublished	―
KP172340	―	B2b	Argentina	Gran Chaco	―	Sevini et al. 2014, Unpublished	―
KP172385	―	B2b	Argentina	Gran Chaco	―	Sevini et al. 2014, Unpublished	―
KC503928	―	B2b	Bolivia	―	―	Taboada-Echalar et al. 2013	―
KC503926	―	B2b2	Bolivia	―	―	Taboada-Echalar et al. 2013	―
KC503925	―	B2b2a	Bolivia	―	―	Taboada-Echalar et al. 2013	―
KC503927	―	B2b2a	Bolivia	―	―	Taboada-Echalar et al. 2013	―
EU095210	―	B2b	Brazil	―	Xavante	Fagundes et al. 2008	―
―	HG01437	B2b	Colombia	―	―	1000Genomes	―
―	HG01479	B2b	Colombia	Medellin	―	1000Genomes	―
KY680939	―	B2b	Ecuador	Loja	Mestizo	Brandini et al. 2017	―
KY680940	―	B2b	Ecuador	Loja	Native	Brandini et al. 2017	―
KY680941	―	B2b	Ecuador	Loja	Native Saraguro	Brandini et al. 2017	―
KY680947	―	B2b	Ecuador	Tungurahua	Mestizo	Brandini et al. 2017	―
KY680948	―	B2b	Ecuador	Pichincha, Perdro Vicente Maldonado	Mestizo	Brandini et al. 2017	―
KY680946	―	B2b12a	Ecuador	Morona-Santiago, Yaupi	Native Shuar	Brandini et al. 2017	―
EU095532	―	B2b5	Ecuador	―	Cayapa	Tamm et al. 2007	―
KY680884	―	B2b5	Ecuador	Pichincha, Juan Montalvo	Native Cayambe	Brandini et al. 2017	―
KY680885	―	B2b5	Ecuador	Cotopaxi, Mulalo	Mestizo	Brandini et al. 2017	―
KY680886	―	B2b5	Ecuador	Pichincha, San Miguel de Los Boncos	Mestizo	Brandini et al. 2017	―
KY680887	―	B2b5	Ecuador	Imbabura, Ibarra	Mestizo	Brandini et al. 2017	―
KY680888	―	B2b5	Ecuador	Loja, Oñacapa	Native	Brandini et al. 2017	―
KY680889	―	B2b5	Ecuador	Pichincha, Quito	Mestizo	Brandini et al. 2017	―
KY680893	―	B2b5a	Ecuador	Loja, Oñacapa	Native	Brandini et al. 2017	―
KY680894	―	B2b5a	Ecuador	―	Native	Brandini et al. 2017	―
KY680895	―	B2b5a	Ecuador	Loja	Mestizo	Brandini et al. 2017	―
KY680890	―	B2b5a1	Ecuador	―	Native	Brandini et al. 2017	―
KY680891	―	B2b5a1	Ecuador	―	Native	Brandini et al. 2017	―
KY680892	―	B2b5a1	Ecuador	Loja	Mestizo	Brandini et al. 2017	―
KY680904	―	B2b5b	Ecuador	―	Mestizo	Brandini et al. 2017	―
KY680905	―	B2b5b	Ecuador	Pichincha	Mestizo	Brandini et al. 2017	―
KY680896	―	B2b5b1a	Ecuador	Pichicha, Ruminahui	Mestizo	Brandini et al. 2017	―
KY680897	―	B2b5b1a	Ecuador	Pichincha, Quito	Mestizo	Brandini et al. 2017	―
KY680903	―	B2b5b1a	Ecuador	―	Mestizo	Brandini et al. 2017	―
KY680898	―	B2b5b1a1	Ecuador	Pichicha, Ruminahui	Mestizo	Brandini et al. 2017	―
KY680899	―	B2b5b1a1	Ecuador	Loja, Linderos	Native	Brandini et al. 2017	―
KY680900	―	B2b5b1a1	Ecuador	Loja, Gañil	Native	Brandini et al. 2017	―
KY680901	―	B2b5b1a1	Ecuador	Loja, Oñacapa	Native	Brandini et al. 2017	―
KY680902	―	B2b5b1a1	Ecuador	Bolivar, Piñato	Native Quincha	Brandini et al. 2017	―
KY680925	―	B2b6a	Ecuador	Loja, Oñacapa	Native	Brandini et al. 2017	―
KY680906	―	B2b6a1	Ecuador	Pichincha, Quito	Mestizo	Brandini et al. 2017	―
KY680907	―	B2b6a1	Ecuador	Pichincha, Ruminahui	Mestizo	Brandini et al. 2017	―
KY680908	―	B2b6a1	Ecuador	Loja, Gañil	Native	Brandini et al. 2017	―
KY680910	―	B2b6a1	Ecuador	Loja, Gañil	Mestizo	Brandini et al. 2017	―
KY680923	―	B2b6a1	Ecuador	Cotopxi, Pujili	Mestizo	Brandini et al. 2017	―
KY680924	―	B2b6a1	Ecuador	Pichincha, Machachi	Native Quitu-Cara/Cayambe	Brandini et al. 2017	―
KY680911	―	B2b6a1a	Ecuador	―	Native	Brandini et al. 2017	―
KY680912	―	B2b6a1a	Ecuador	―	Native	Brandini et al. 2017	―
KY680913	―	B2b6a1a	Ecuador	―	Native	Brandini et al. 2017	―
KY680914	―	B2b6a1a	Ecuador	―	Native	Brandini et al. 2017	―
KY680915	―	B2b6a1a	Ecuador	Chimborazo, Riobamba	Mestizo	Brandini et al. 2017	―
KY680916	―	B2b6a1a	Ecuador	Chimborazo, Colta	Native Puruhà	Brandini et al. 2017	―
KY680917	―	B2b6a1a	Ecuador	Cotopaxi, Salcedo	Mestizo	Brandini et al. 2017	―
KY680918	―	B2b6a1a	Ecuador	Loja, Oñacapa	Native	Brandini et al. 2017	―
KY680919	―	B2b6a1a	Ecuador	Loja, Gañil	Native	Brandini et al. 2017	―
KY680920	―	B2b6a1a	Ecuador	―	Native	Brandini et al. 2017	―
KY680921	―	B2b6a1a	Ecuador	Pichincha, Quito	Mestizo	Brandini et al. 2017	―
KY680922	―	B2b6a1a	Ecuador	Loja	Mestizo	Brandini et al. 2017	―
KY680932	―	B2b6b	Ecuador	Pichincha, Quito	Mestizo	Brandini et al. 2017	―
KY680926	―	B2b6b1	Ecuador	Loja	Mestizo	Brandini et al. 2017	―
KY680930	―	B2b6b1	Ecuador	―	Mestizo	Brandini et al. 2017	―
KY680931	―	B2b6b1	Ecuador	Loja	Mestizo	Brandini et al. 2017	―
KY680927	―	B2b6b1a	Ecuador	Loja	Mestizo	Brandini et al. 2017	―
KY680928	―	B2b6b1a	Ecuador	Loja, Gonzanama	Native	Brandini et al. 2017	―
KY680929	―	B2b6b1a	Ecuador	Loja	Mestizo	Brandini et al. 2017	―
KY680933	―	B2b7	Ecuador	Loja, Oñacapa	Native	Brandini et al. 2017	―
KY680934	―	B2b7	Ecuador	―	Mestizo	Brandini et al. 2017	―
KY680935	―	B2b7	Ecuador	―	Native	Brandini et al. 2017	―
KY680936	―	B2b7	Ecuador	Loja, Oñacapa	Native	Brandini et al. 2017	―
KY680937	―	B2b7	Ecuador	―	Native	Brandini et al. 2017	―
KY680938	―	B2b7	Ecuador	Loja	Mestizo	Brandini et al. 2017	―
KY680942	―	B2b8a	Ecuador	―	Native	Brandini et al. 2017	―
KY680943	―	B2b8a	Ecuador	Loja, Oñacapa	Native	Brandini et al. 2017	―
KY680944	―	B2b8a	Ecuador	Loja	Mestizo	Brandini et al. 2017	―
KY680945	―	B2b9c	Ecuador	Los Rios, Babahoyo	Mestizo	Brandini et al. 2017	―
HQ012137	―	B2b4	Mexico	―	―	Kumar et al. 2011	―
―	HG01936	B2b	Peru	Lima	―	1000Genomes	―
―	HG01967	B2b	Peru	Lima	―	1000Genomes	―
―	HG01971	B2b	Peru	Lima	―	1000Genomes	―
―	HG02002	B2b	Peru	Lima	―	1000Genomes	―
―	HG02003	B2b	Peru	Lima	―	1000Genomes	―
―	HG02090	B2b	Peru	Lima	―	1000Genomes	―
―	HG02146	B2b	Peru	Lima	―	1000Genomes	―
―	HG02253	B2b	Peru	Lima	―	1000Genomes	―
JX669137	―	B2b	Peru	―	―	Tito et al. 2012, Direct Submission	―
JX669155	―	B2b	Peru	―	―	Tito et al. 2012, Direct Submission	―
JX669161	―	B2b	Peru	―	―	Tito et al. 2012, Direct Submission	―
JX669179	―	B2b	Peru	―	―	Tito et al. 2012, Direct Submission	―
JX669181	―	B2b	Peru	―	―	Tito et al. 2012, Direct Submission	―
JX669200	―	B2b	Peru	―	―	Tito et al. 2012, Direct Submission	―
JX669208	―	B2b	Peru	―	―	Tito et al. 2012, Direct Submission	―
JX669213	―	B2b	Peru	―	―	Tito et al. 2012, Direct Submission	―
JX669267	―	B2b	Peru	―	―	Tito et al. 2012, Direct Submission	―
JX669279	―	B2b	Peru	―	―	Tito et al. 2012, Direct Submission	―
JX669298	―	B2b	Peru	―	―	Tito et al. 2012, Direct Submission	―
JX669375	―	B2b	Peru	―	―	Tito et al. 2012, Direct Submission	―
KU523280	―	B2b	Peru	―	Ancient sample	Llamas et al. 2016	1,264±750
―	HG02104	B2b10a	Peru	Lima	―	1000Genomes	―
JX669222	―	B2b10a	Peru	―	―	Tito et al. 2012, Direct Submission	―
JX669340	―	B2b10a	Peru	―	―	Tito et al. 2012, Direct Submission	―
JX669343	―	B2b10a	Peru	―	―	Tito et al. 2012, Direct Submission	―
JX669373	―	B2b10a	Peru	―	―	Tito et al. 2012, Direct Submission	―
JX669302	―	B2b10b	Peru	―	―	Tito et al. 2012, Direct Submission	―
JX669345	―	B2b10b	Peru	―	―	Tito et al. 2012, Direct Submission	―
JX669346	―	B2b10b	Peru	―	―	Tito et al. 2012, Direct Submission	―
JX669351	―	B2b10b	Peru	―	―	Tito et al. 2012, Direct Submission	―
JX669372	―	B2b10b	Peru	―	―	Tito et al. 2012, Direct Submission	―
JX669392	―	B2b10b	Peru	―	―	Tito et al. 2012, Direct Submission	―
JX669139	―	B2b12a	Peru	―	―	Tito et al. 2012, Direct Submission	―
JX669147	―	B2b12a	Peru	―	―	Tito et al. 2012, Direct Submission	―
JX669168	―	B2b12a	Peru	―	―	Tito et al. 2012, Direct Submission	―
―	HG02425	B2b12b	Peru	Lima	―	1000Genomes	―
JX669255	―	B2b12b	Peru	―	―	Tito et al. 2012, Direct Submission	―
JX669261	―	B2b12b	Peru	―	―	Tito et al. 2012, Direct Submission	―
JX669323	―	B2b12b	Peru	―	―	Tito et al. 2012, Direct Submission	―
JX669205	―	B2b13	Peru	―	―	Tito et al. 2012, Direct Submission	―
JX669230	―	B2b13	Peru	―	―	Tito et al. 2012, Direct Submission	―
JX669251	―	B2b13	Peru	―	―	Tito et al. 2012, Direct Submission	―
JX669334	―	B2b5	Peru	―	―	Tito et al. 2012, Direct Submission	―
JX669325	―	B2b5b1	Peru	―	―	Tito et al. 2012, Direct Submission	―
JX669148	―	B2b6a1	Peru	―	―	Tito et al. 2012, Direct Submission	―
JX669152	―	B2b6a1	Peru	―	―	Tito et al. 2012, Direct Submission	―
JX669238	―	B2b6a1	Peru	―	―	Tito et al. 2012, Direct Submission	―
KY680909	―	B2b6a1	Peru	―	Mestizo	Brandini et al. 2017	―
JX669305	―	B2b6b1a	Peru	―	―	Tito et al. 2012, Direct Submission	―
―	HG01924	B2b8	Peru	Lima	―	1000Genomes	―
JX669327	―	B2b8	Peru	―	―	Tito et al. 2012, Direct Submission	―
―	HG01927	B2b9	Peru	Lima	―	1000Genomes	―
―	HG01968	B2b9	Peru	Lima	―	1000Genomes	―
―	HG01992	B2b9	Peru	Lima	―	1000Genomes	―
JX669193	―	B2b9	Peru	―	―	Tito et al. 2012, Direct Submission	―
JX669349	―	B2b9	Peru	―	―	Tito et al. 2012, Direct Submission	―
JX669366	―	B2b9	Peru	―	―	Tito et al. 2012, Direct Submission	―
JX669307	―	B2b9a	Peru	―	―	Tito et al. 2012, Direct Submission	―
JX669358	―	B2b9a	Peru	―	―	Tito et al. 2012, Direct Submission	―
JX669371	―	B2b9a	Peru	―	―	Tito et al. 2012, Direct Submission	―
JX669388	―	B2b9a	Peru	―	―	Tito et al. 2012, Direct Submission	―
KU523277	―	B2b9a	Peru	―	Ancient sample	Llamas et al. 2016	744±170
KU523283	―	B2b9a	Peru	―	Ancient sample	Llamas et al. 2016	1,639±275
―	HG02277	B2b9b	Peru	Lima	―	1000Genomes	―
JX669154	―	B2b9b	Peru	―	―	Tito et al. 2012, Direct Submission	―
JX669160	―	B2b9b	Peru	―	―	Tito et al. 2012, Direct Submission	―
KU523278	―	B2b9b	Peru	―	Ancient sample	Llamas et al. 2016	744±170
KU523298	―	B2b9b	Peru	―	Ancient sample	Llamas et al. 2016	779±235
JX669338	―	B2b9c	Peru	―	―	Tito et al. 2012, Direct Submission	―
KU523281	―	B2b9c	Peru	―	Ancient sample	Llamas et al. 2016	1,264±750
KU523296	―	B2b9c	Peru	―	Ancient sample	Llamas et al. 2016	509±67
EU095208	―	B2b	USA	―	Pomo	Fagundes et al. 2008	―
KM102138	―	B2b	USA	―	Hisp	Just et al. 2015	―
KM102111	―	B2b2	USA	―	Hisp	Just et al. 2015	―
JF431064	―	B2b1	Venezuela	―	―	Gomez-Carballa et al. 2011	―
JF431065	―	B2b1	Venezuela	―	―	Gomez-Carballa et al. 2011	―
KY681013	―	B2b5	Venezuela	―	―	Brandini et al. 2017	―
